# Supplementary material for: A plant chitinase controls cortical infection thread progression and nitrogen-fixing symbiosis
Source: eLife journal article supplement (doi:10.7554/elife.38874), 2018-10-03
Supplement: supp [file elife-38874-supp-v1.zip]

Archive with 23 entries (23 files):
- elife_poa_e38874_Figure_4_figure_supplement_2.tif
- elife_poa_e38874_Figure_3_source_data_1.docx
- elife_poa_e38874_Figure_4_figure_supplement_4.tif
- elife_poa_e38874_Figure_4_figure_supplement_3.tif
- elife_poa_e38874_Figure_3_figure_supplement_7.tif
- elife_poa_e38874_Figure_3_figure_supplement_3.tif
- elife_poa_e38874_Transparent_Reporting_File.pdf
- elife_poa_e38874_Figure_3_figure_supplement_4.tif
- elife_poa_e38874_Figure_3_figure_supplement_2.tif
- elife_poa_e38874_Figure_1_source_data_2.docx
- elife_poa_e38874_Figure_1_figure_supplement_1.tif
- elife_poa_e38874_Figure_2_figure_supplement_1.tif
- elife_poa_e38874_Figure_1_figure_supplement_3.tif
- elife_poa_e38874_Figure_1_figure_supplement_2.tif
- elife_poa_e38874_Figure_1_figure_supplement_4.tif
- elife_poa_e38874_Figure_4_figure_supplement_6.tif
- elife_poa_e38874_Figure_4_figure_supplement_7.tif
- elife_poa_e38874_Figure_3_figure_supplement_1.tif
- elife_poa_e38874_Figure_4_figure_supplement_5.tif
- elife_poa_e38874_Figure_3_figure_supplement_5.tif
- elife_poa_e38874_Figure_3_figure_supplement_6.tif
- elife_poa_e38874_Figure_1_source_data_1.docx
- elife_poa_e38874_Figure_4_figure_supplement_1.tif
