# Supplementary material for: A plant chitinase controls cortical infection thread progression and nitrogen-fixing symbiosis
Source: eLife journal article supplement (doi:10.7554/elife.38874), 2018-10-03
Supplement: supp [file elife-38874-supp-v1.zip › elife_poa_e38874_Figure_1_source_data_1.docx]

**Figure 1_source data 1**. Bacterial strains used in this study

| Strain | Relevant characteristics | Reference |
| --- | --- | --- |
| *Mesorhizobium loti* |  |  |
| R7A | Wild-type strain | 34,42 |
| *nodD1* | R7A *nodD1* deletion mutant | 34 |
| *nodD2* | R7A *nodD2* deletion mutant | 34 |
| *nolL* | R7A *nolL* deletion mutant | 37 |
| *nodZ* | R7A *nodZ* deletion mutant | 37 |
|  |  |  |
| *Agrobacterium* |  |  |
| AR1193 | For hairy root transformation | 40 |
