# Supplementary material for: A plant chitinase controls cortical infection thread progression and nitrogen-fixing symbiosis
Source: eLife journal article supplement (doi:10.7554/elife.38874), 2018-10-03
Supplement: supp [file elife-38874-supp-v1.zip › elife_poa_e38874_Figure_1_source_data_2.docx]

**Figure 1_source data 2**. Primers used for RT-qPCR analyses

| Primer name | Sequence |
| --- | --- |
| ATP_F | CAATGTCGCCAAGGCCCATGGTG |
| ATP_R | AACACCACTCTCGATCATTTCTCTG |
| UBC_F | atgtgcattttaagacaggg |
| UBC_R | gaacgtagaagattgcctgaa |
| PP2A_F | GTAAATGCGTCTAAAGATAGGGTCC |
| PP2A_R | ACTAGACTGTAGTGCTTGAGAGGC |
| LB3_F | TGCTGCCACTCAACTCGTAG |
| LB3_R | AAGTCATCACTCCATTCGTCCG |
| SST1_F | TGGAATTCCAATCGTGGGCCA |
| SST1_R | CCAATTGCTATTCCTTCCGCC |
| MPK3_F | ATTGATCCCACCAAAAGAATCACAGTTGAA |
| MPK3_R | CCAATGCTTCCCTGTAGATCATCTC |
| WRKY29_F | GAATCTAAATATAAAAGAGGCAAG |
| WRKY29_R | ACCTGTAGTAGCTTCGAGGATAAGG |
| WRKY33_F | AATGAGGGTATATCAGCCCCTGG |
| WRKY33_R | GGGTGTGTGCATTTATAGTAACTCCTTG |
| N6_F | GCAATCCAGTTCTACAAGATCACA |
| N6_R | GGCTGCTCATTTCACAAGAACTCT |
| NPL_F | CCAAATGATGAAGAACACAAAGAGATCAC |
| NPL_R | CTTGACGCCCTAGCATATGTAGAAG |
| ERN1_F | CCACCCTTGTGCTCATTGTTCTG |
| ERN1_R | CCTACACTCCTCCCTCTCAAG |
