# Supplementary figures and images for: A plant chitinase controls cortical infection thread progression and nitrogen-fixing symbiosis
Source: eLife journal article supplement (doi:10.7554/elife.38874), 2018-10-03

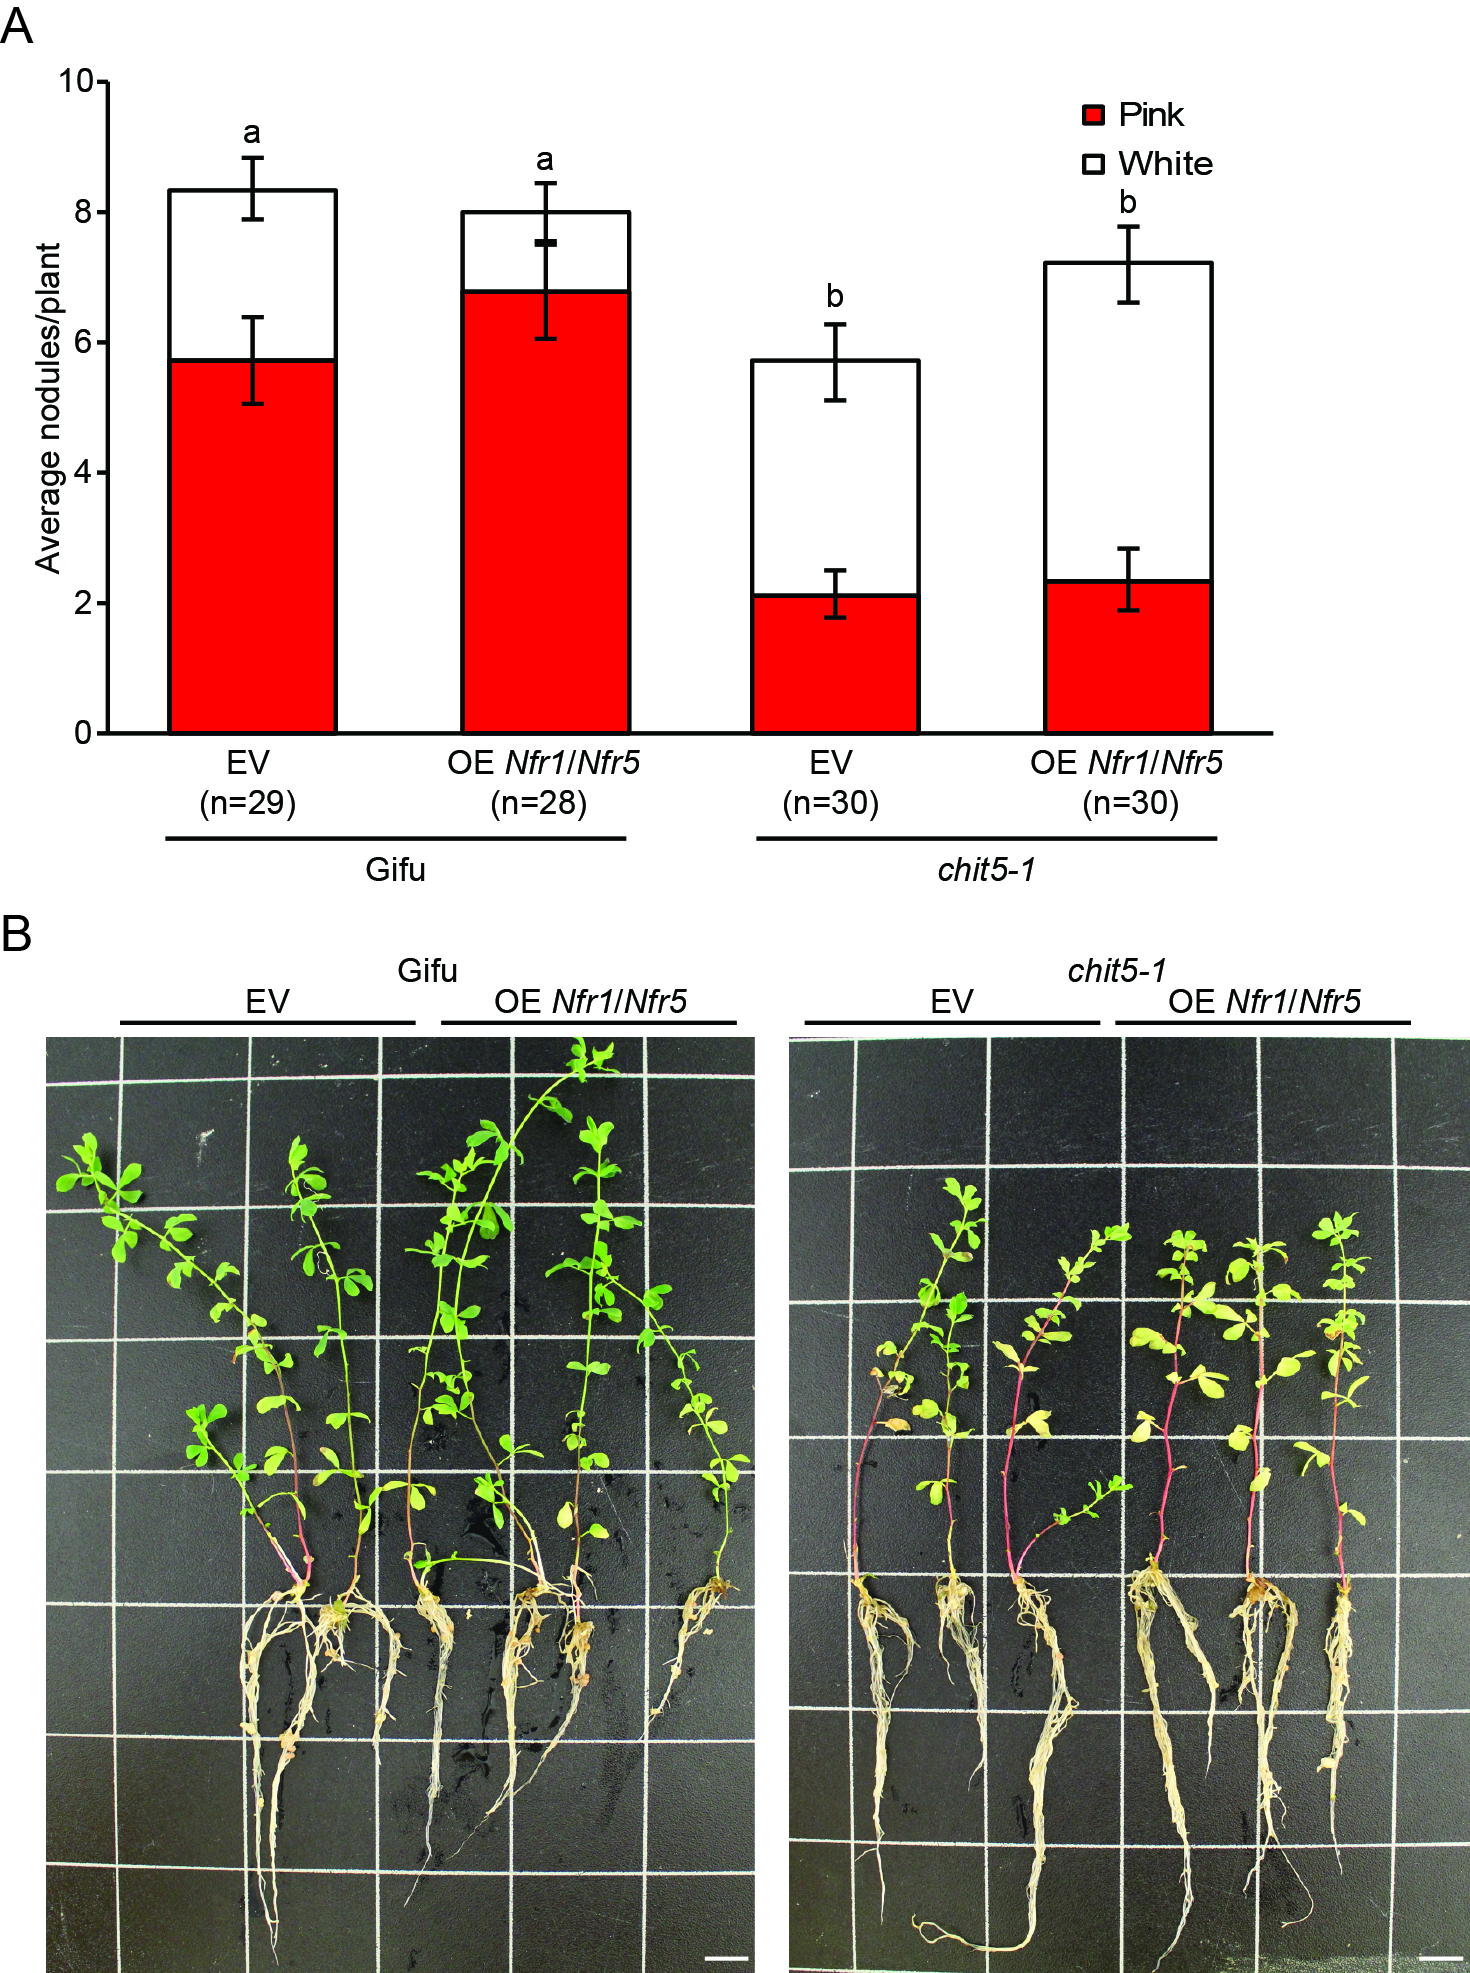

Supplement: supp [file elife-38874-supp-v1.zip › elife_poa_e38874_Figure_4_figure_supplement_2.tif]

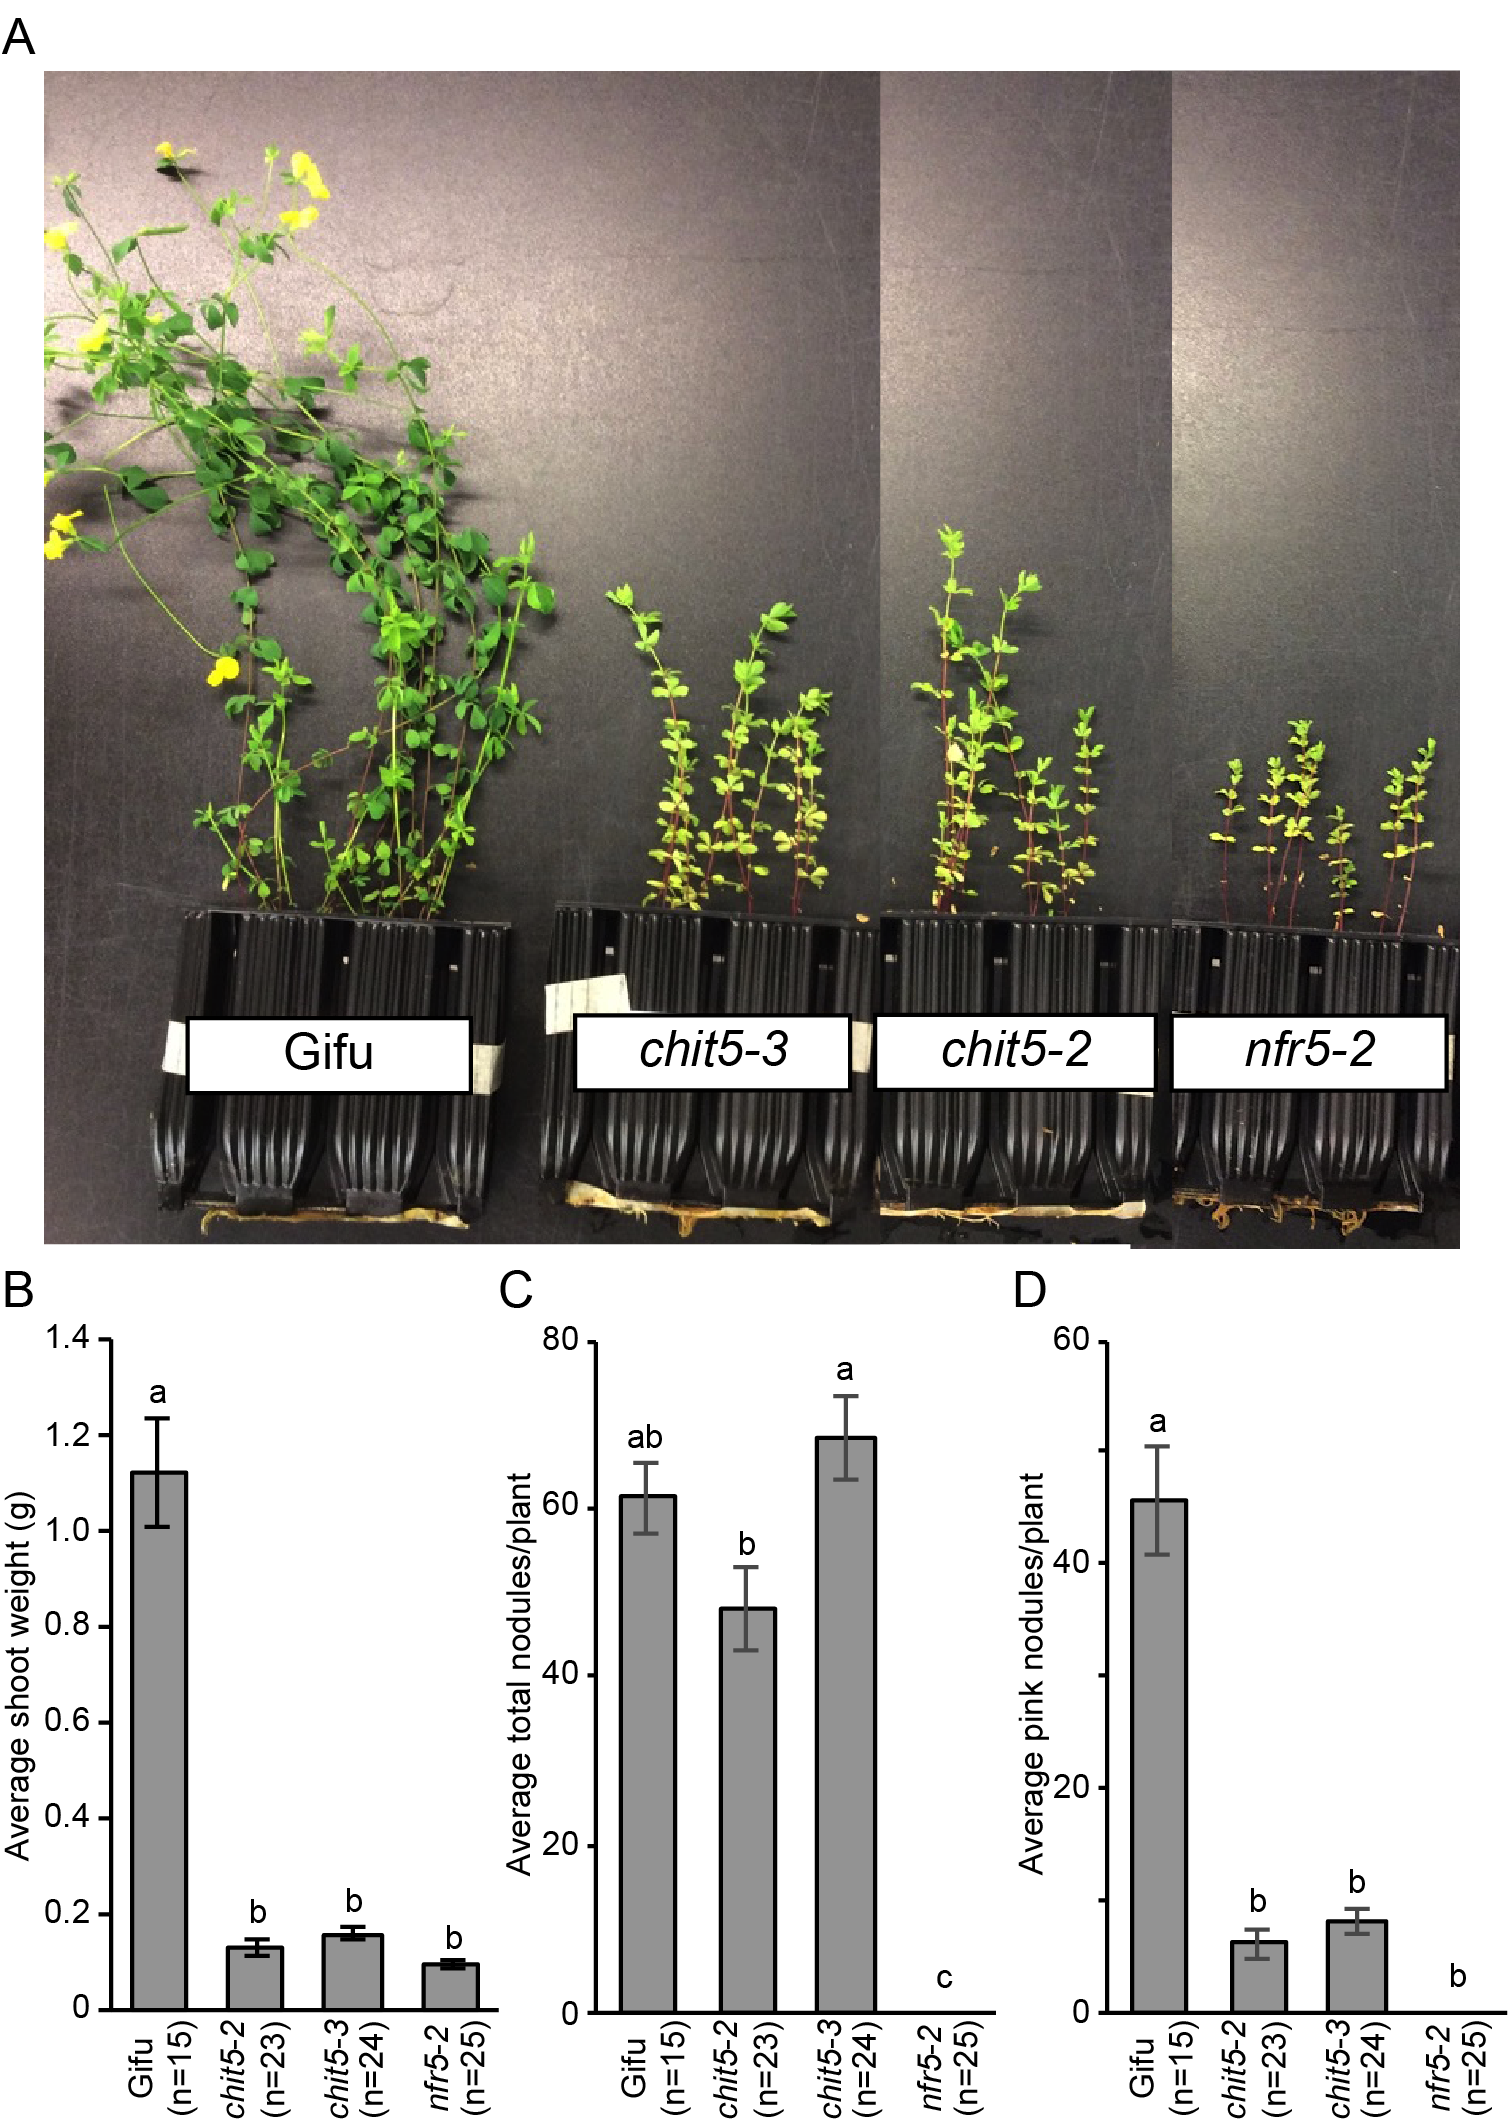

Supplement: supp [file elife-38874-supp-v1.zip › elife_poa_e38874_Figure_4_figure_supplement_4.tif]

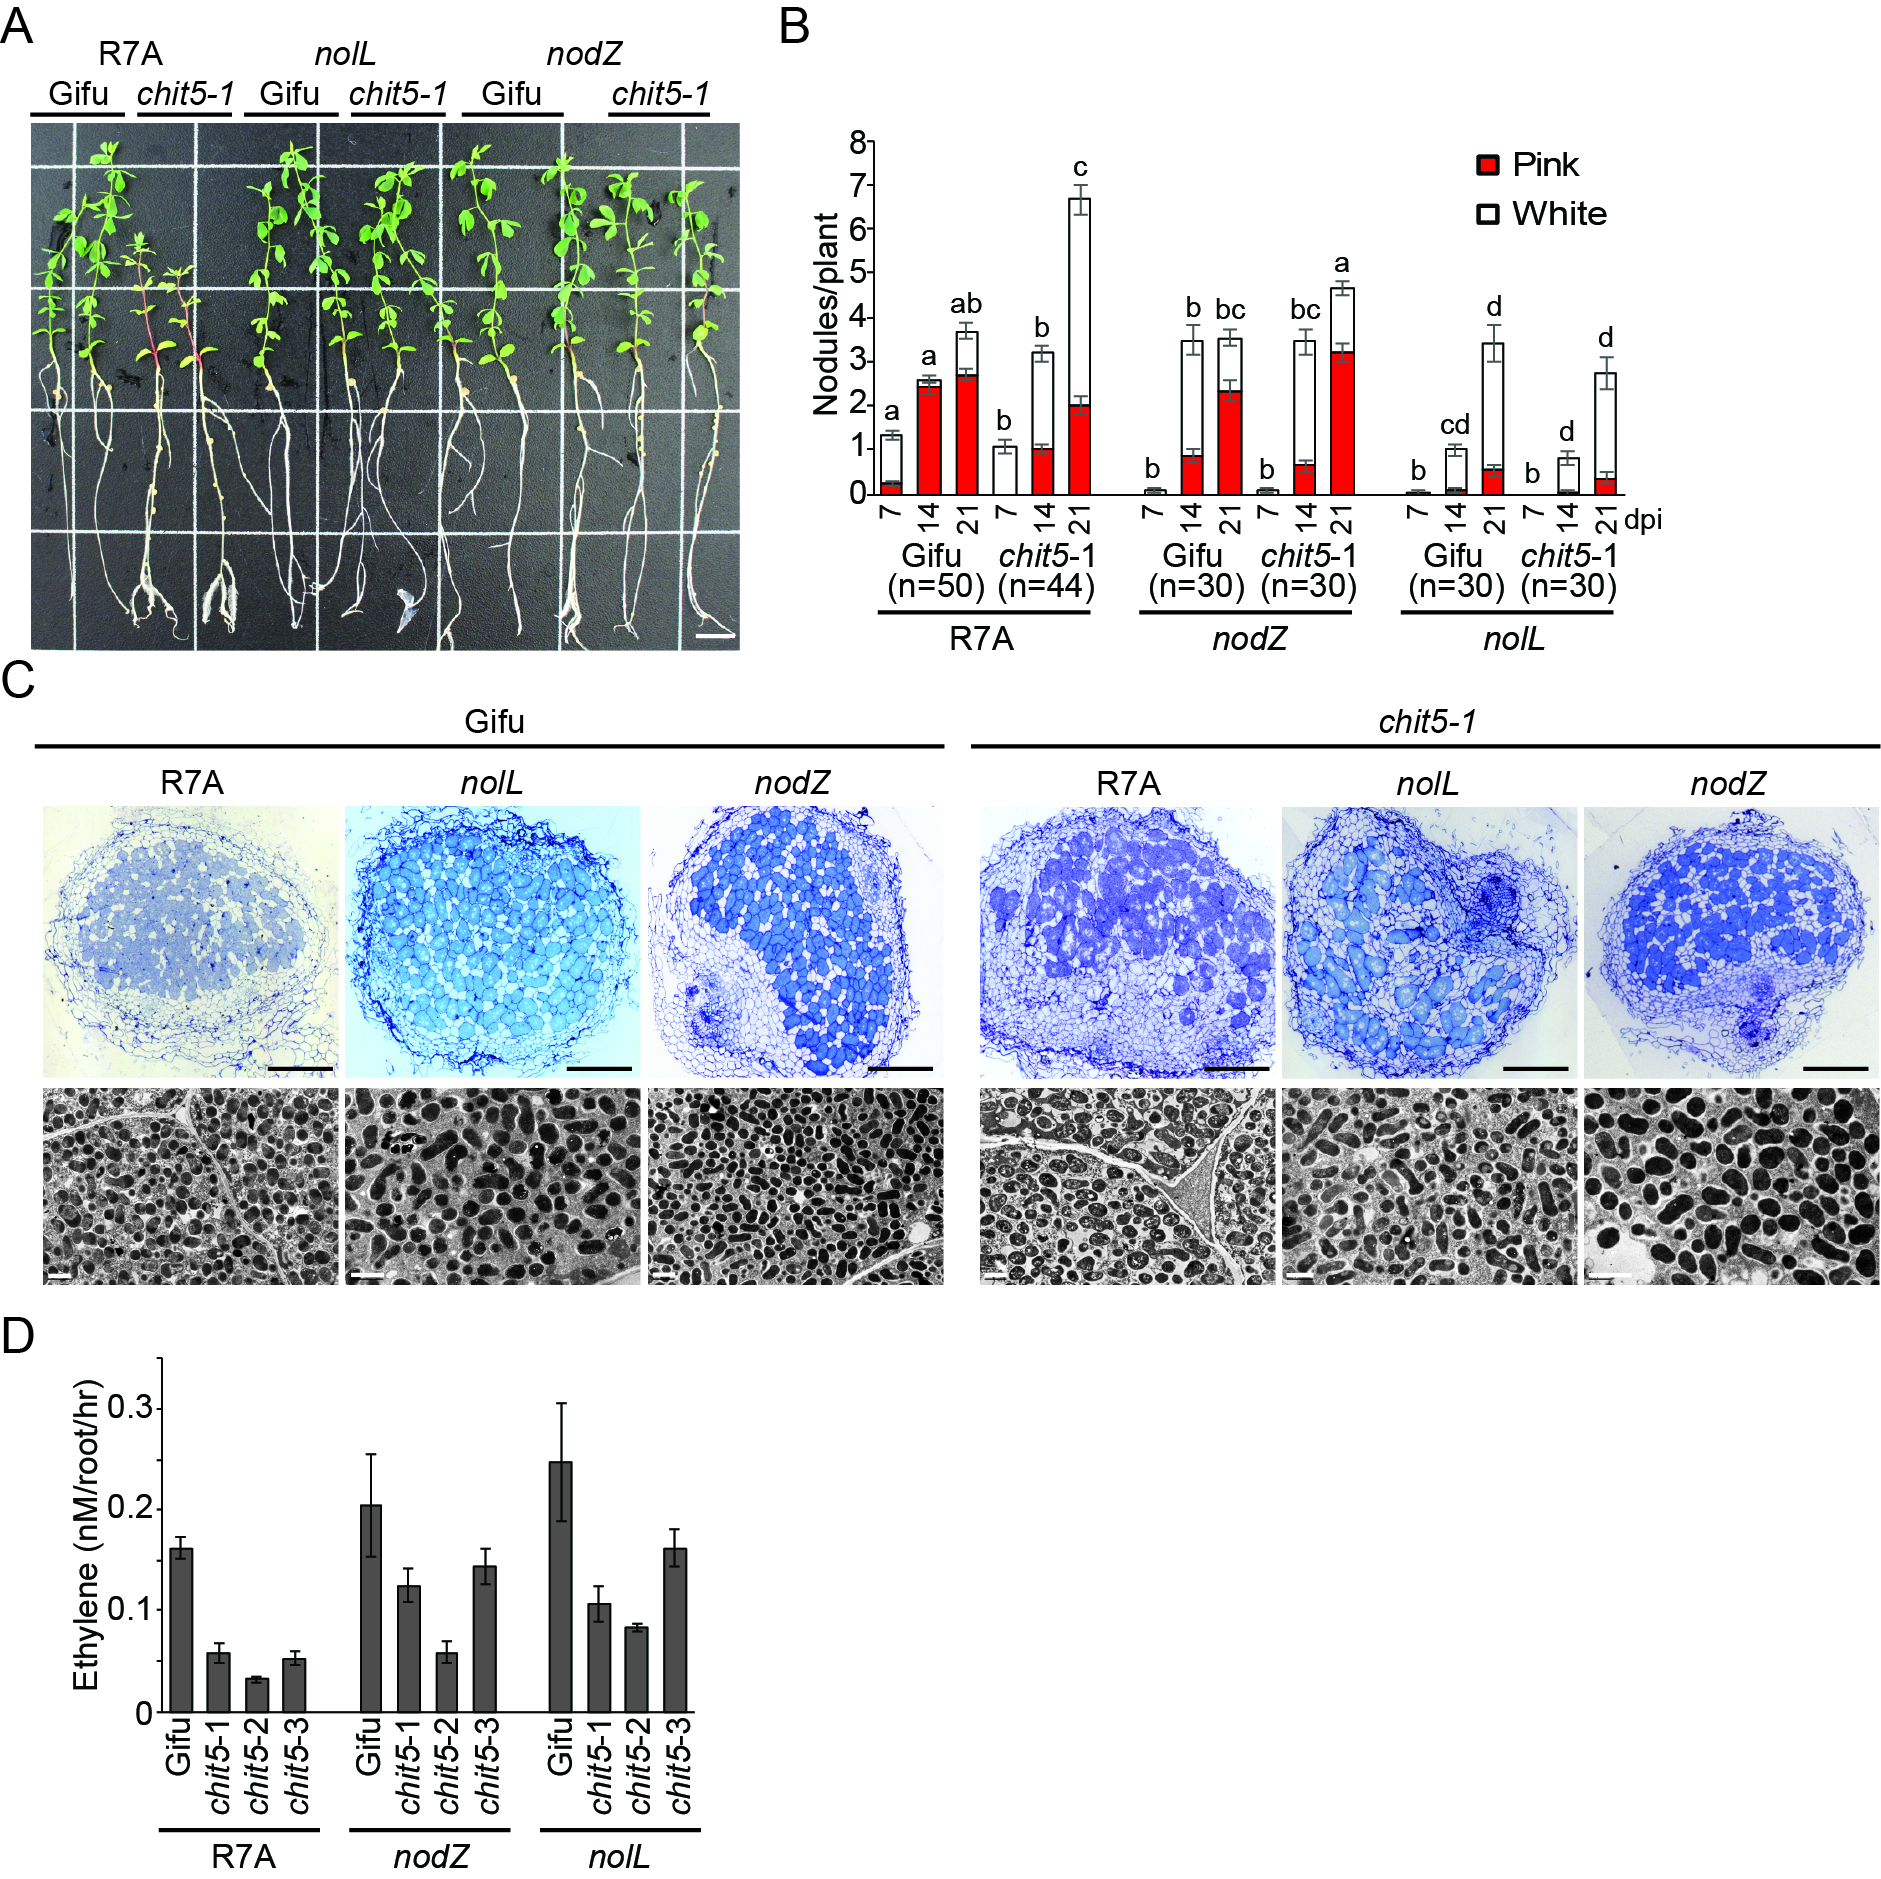

Supplement: supp [file elife-38874-supp-v1.zip › elife_poa_e38874_Figure_4_figure_supplement_3.tif]

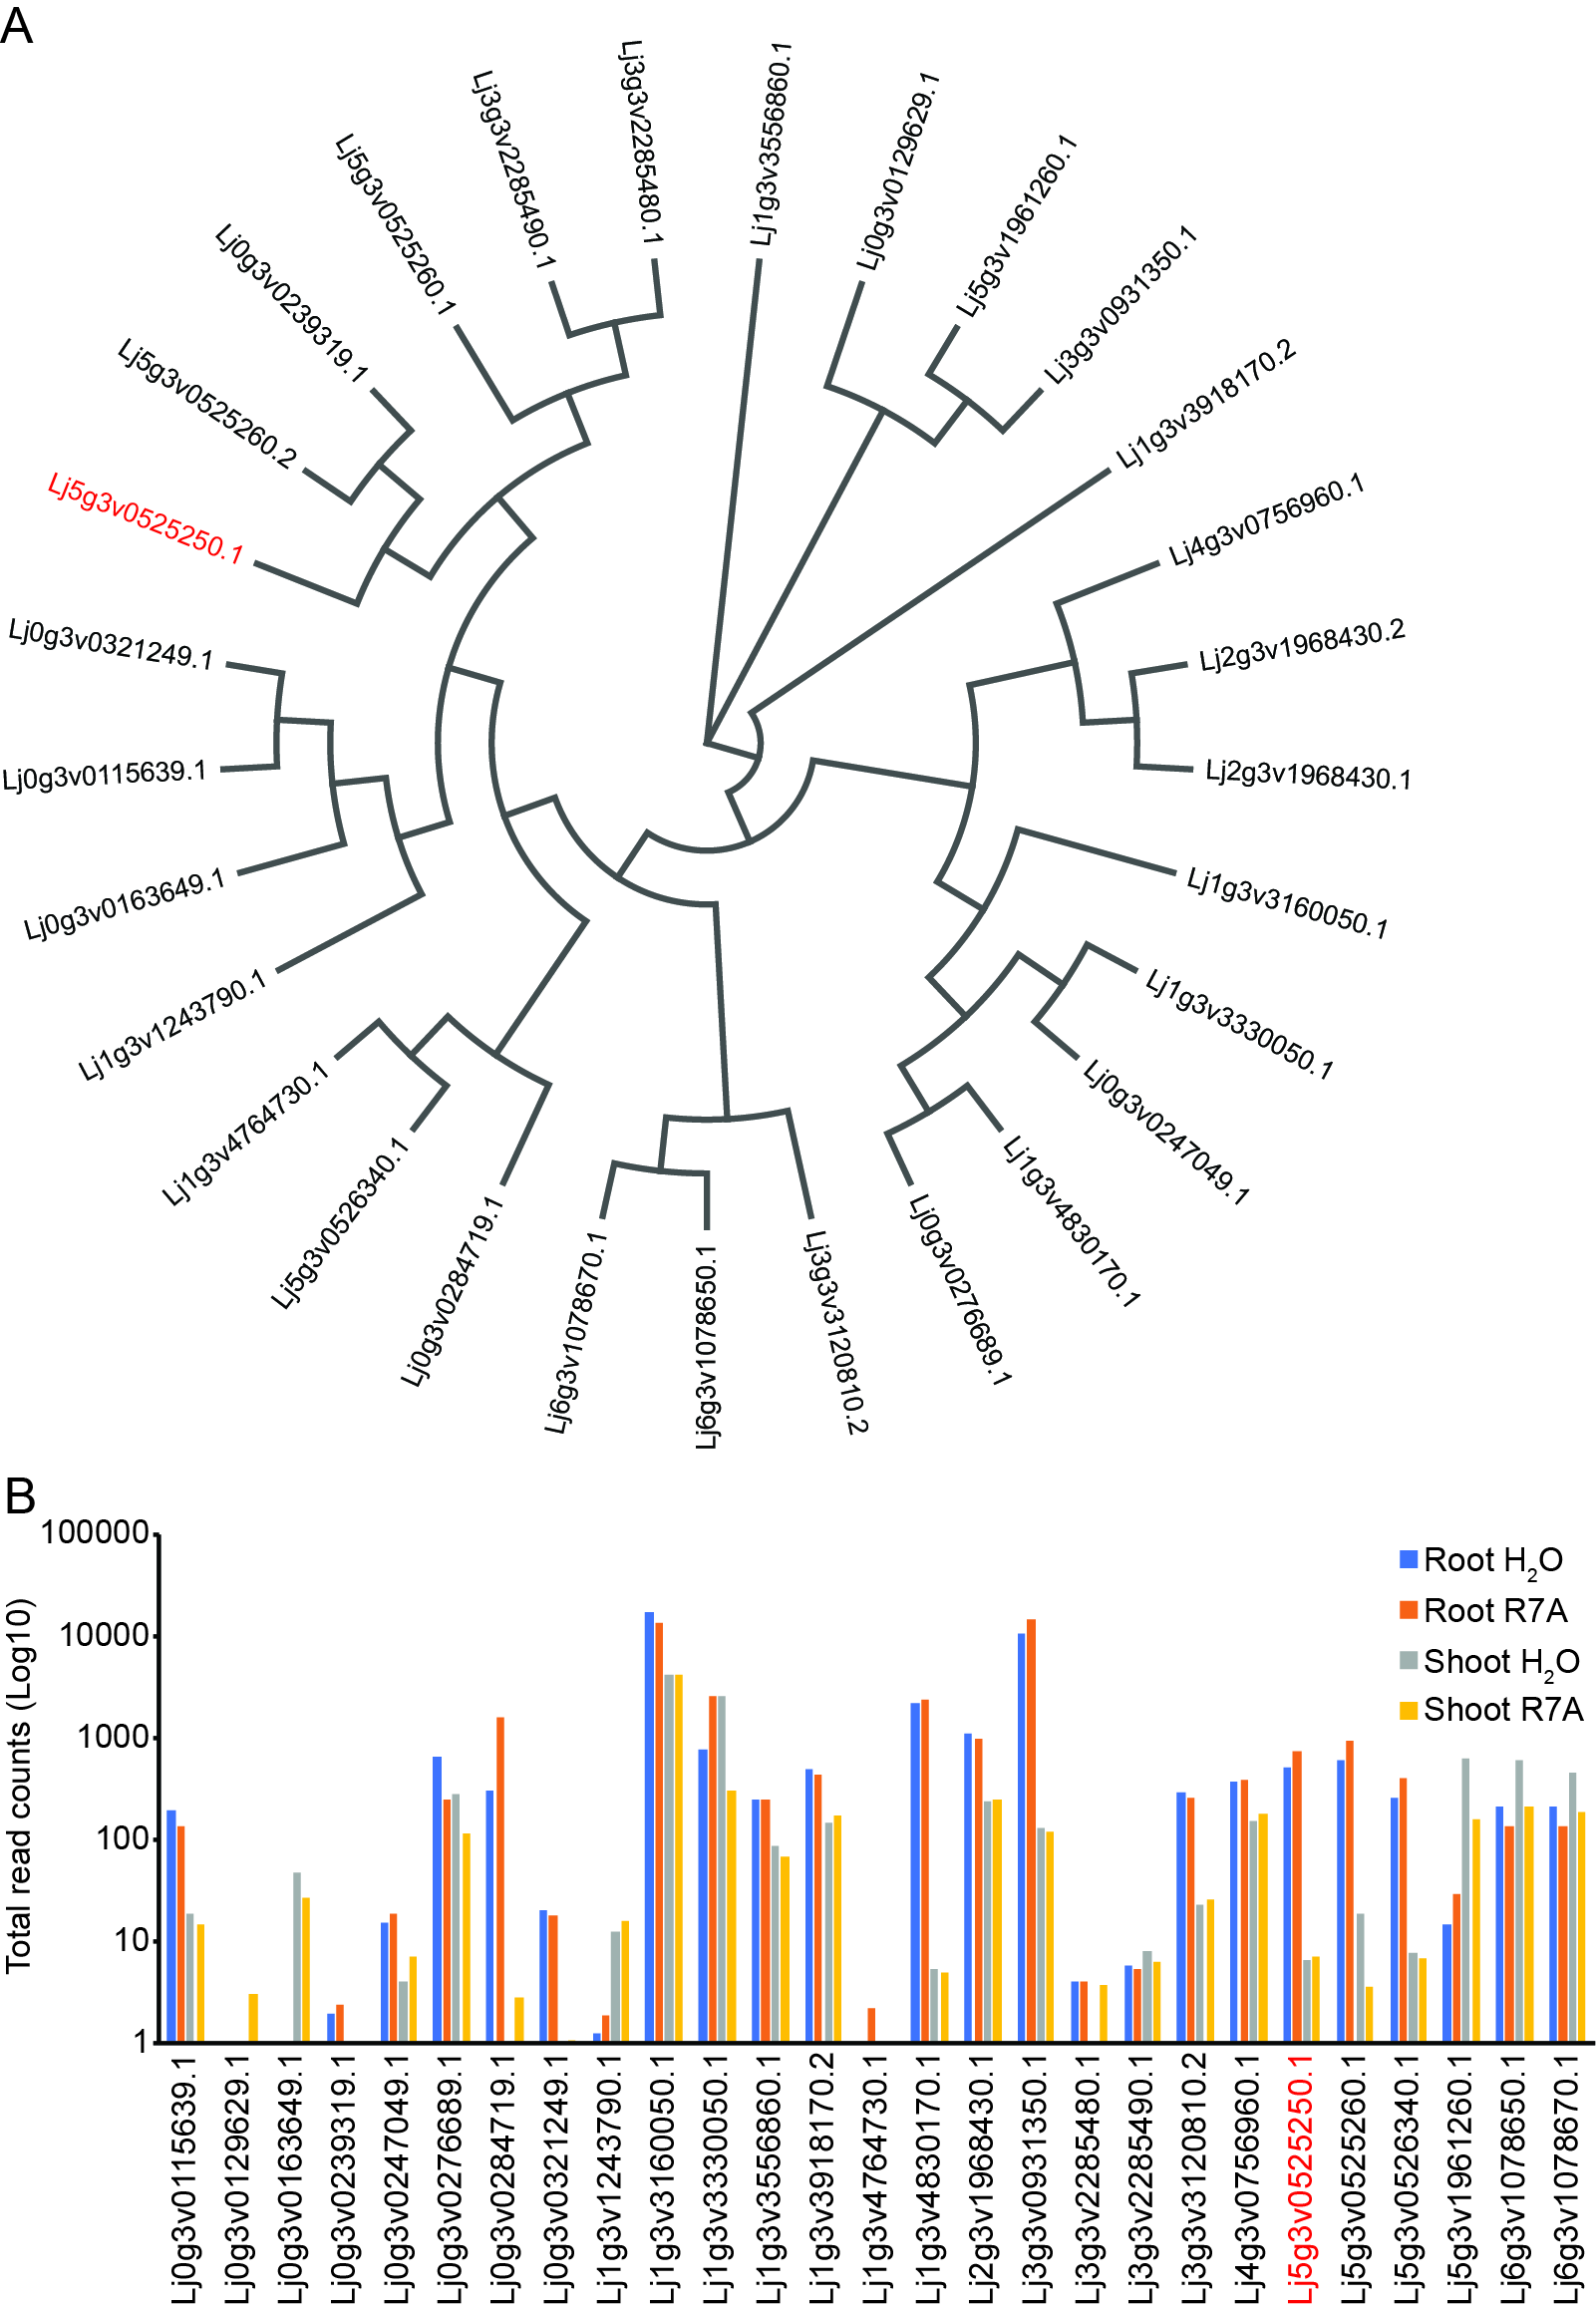

Supplement: supp [file elife-38874-supp-v1.zip › elife_poa_e38874_Figure_3_figure_supplement_7.tif]

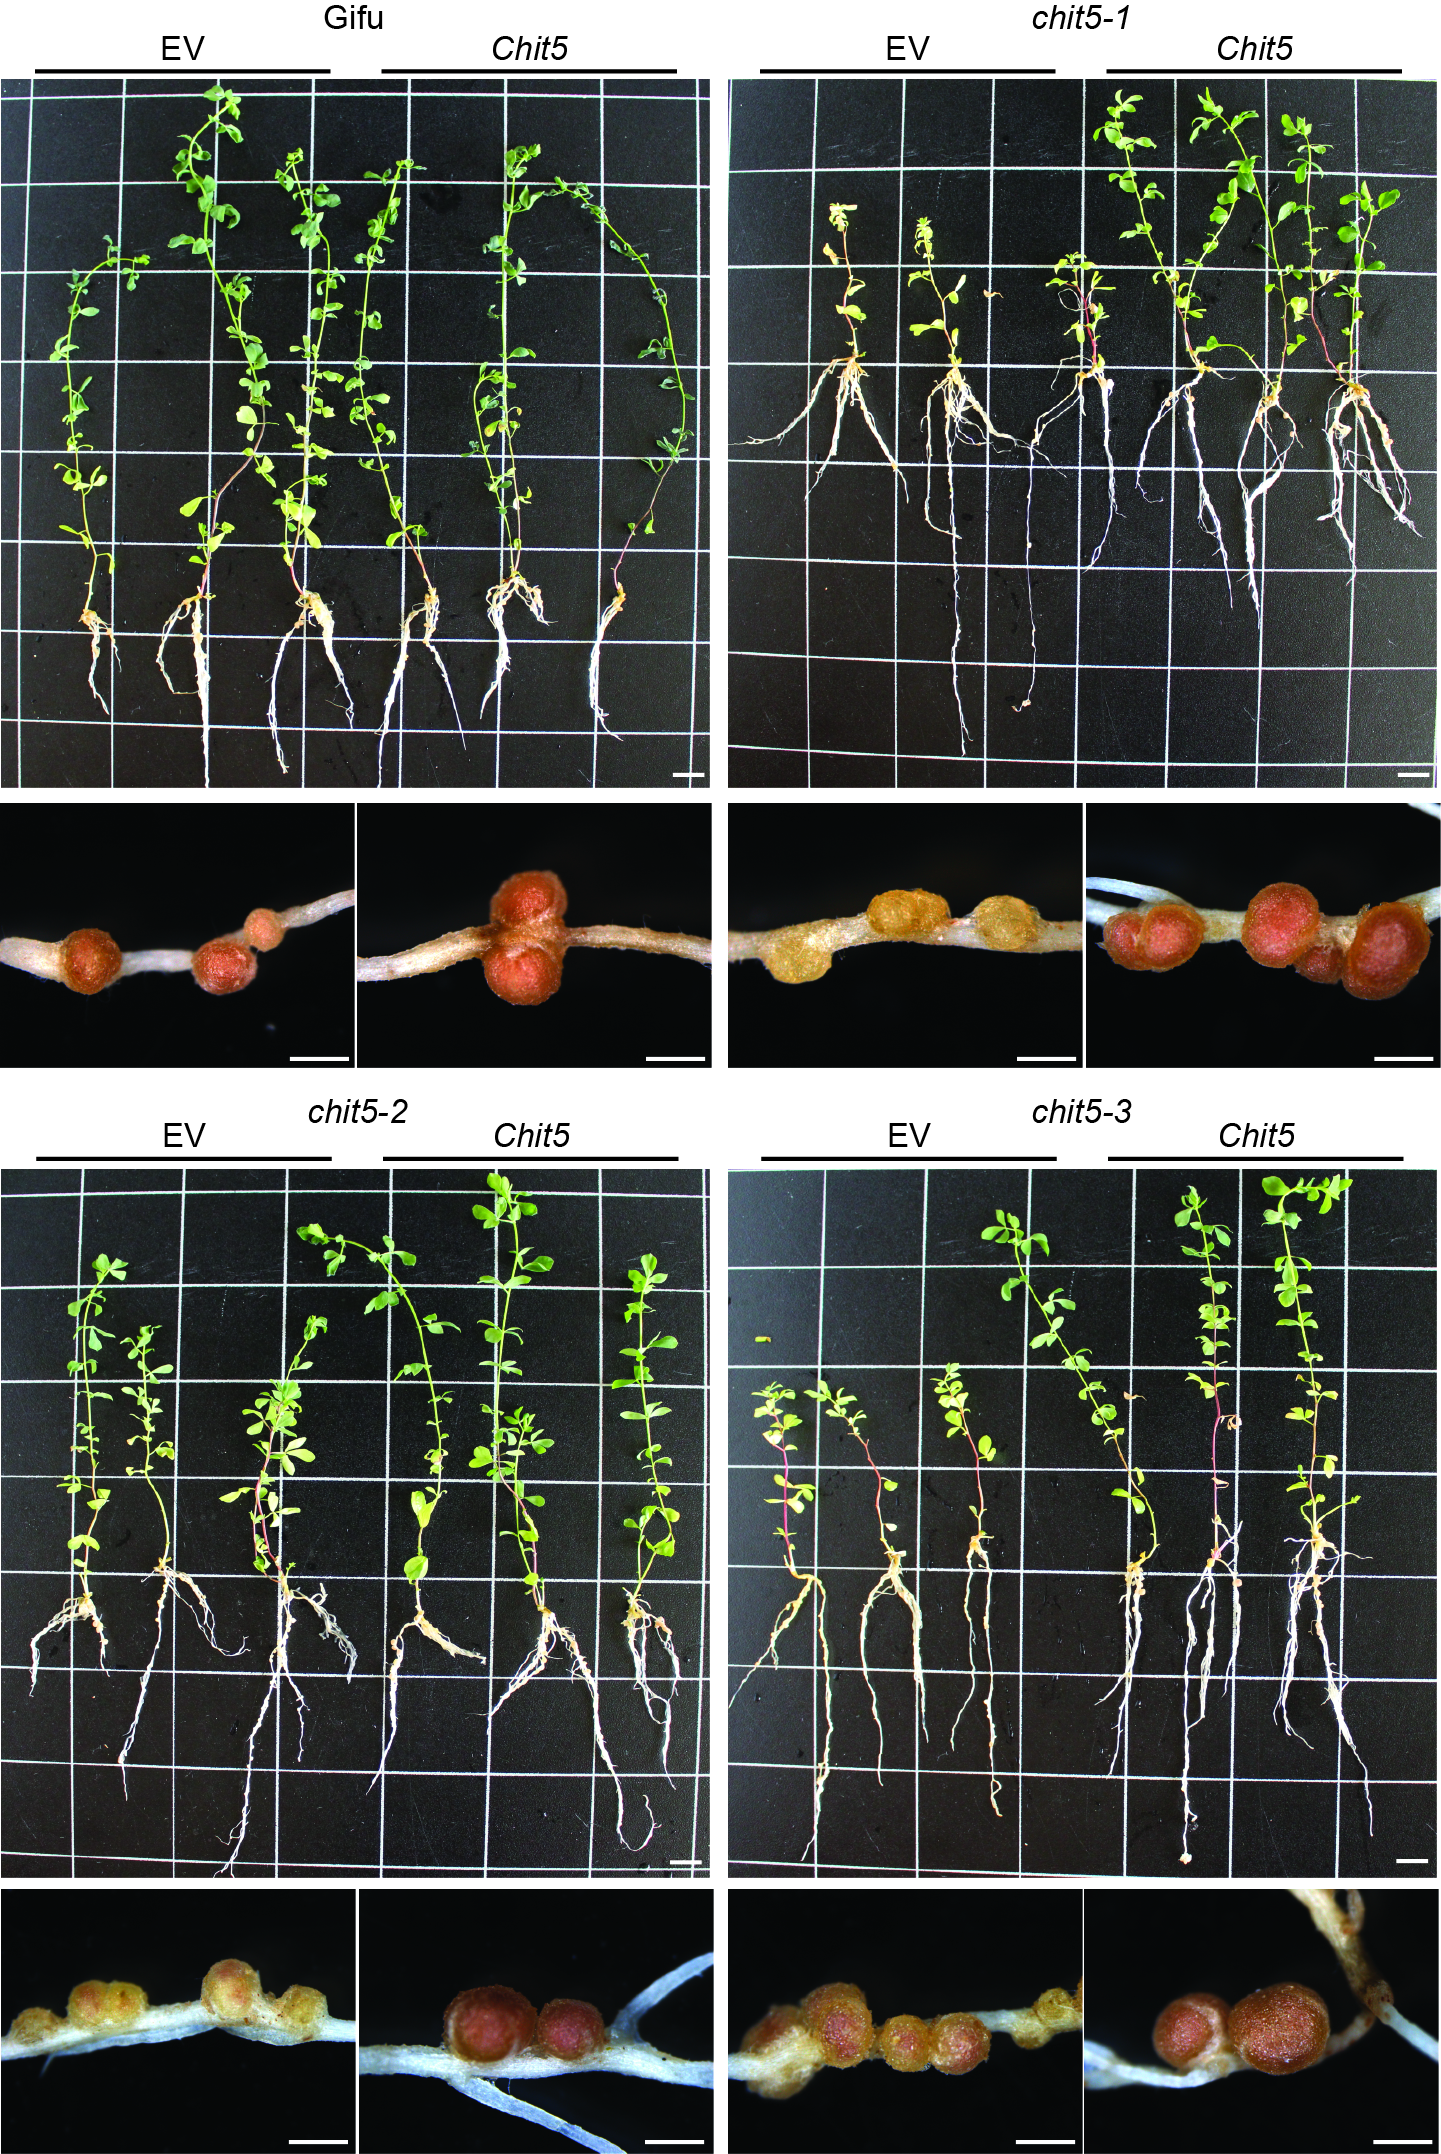

Supplement: supp [file elife-38874-supp-v1.zip › elife_poa_e38874_Figure_3_figure_supplement_3.tif]

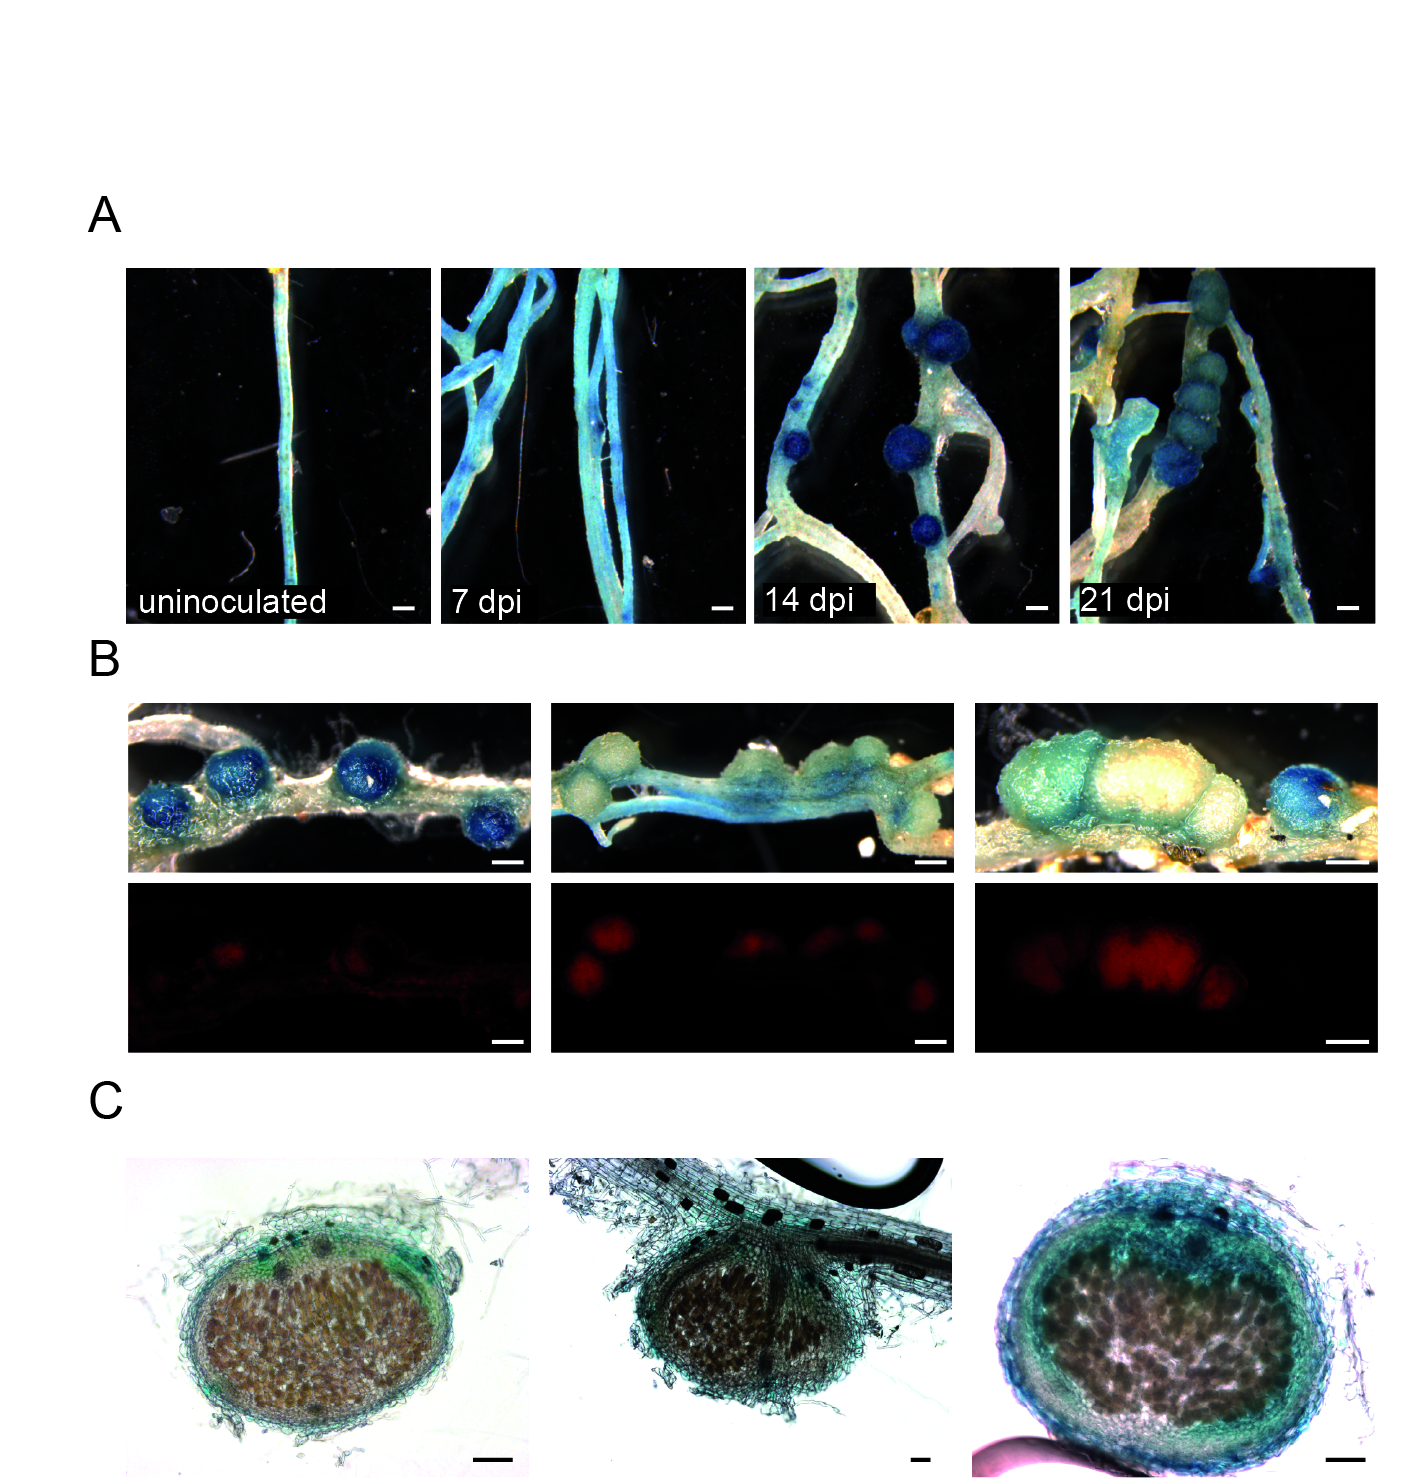

Supplement: supp [file elife-38874-supp-v1.zip › elife_poa_e38874_Figure_3_figure_supplement_4.tif]

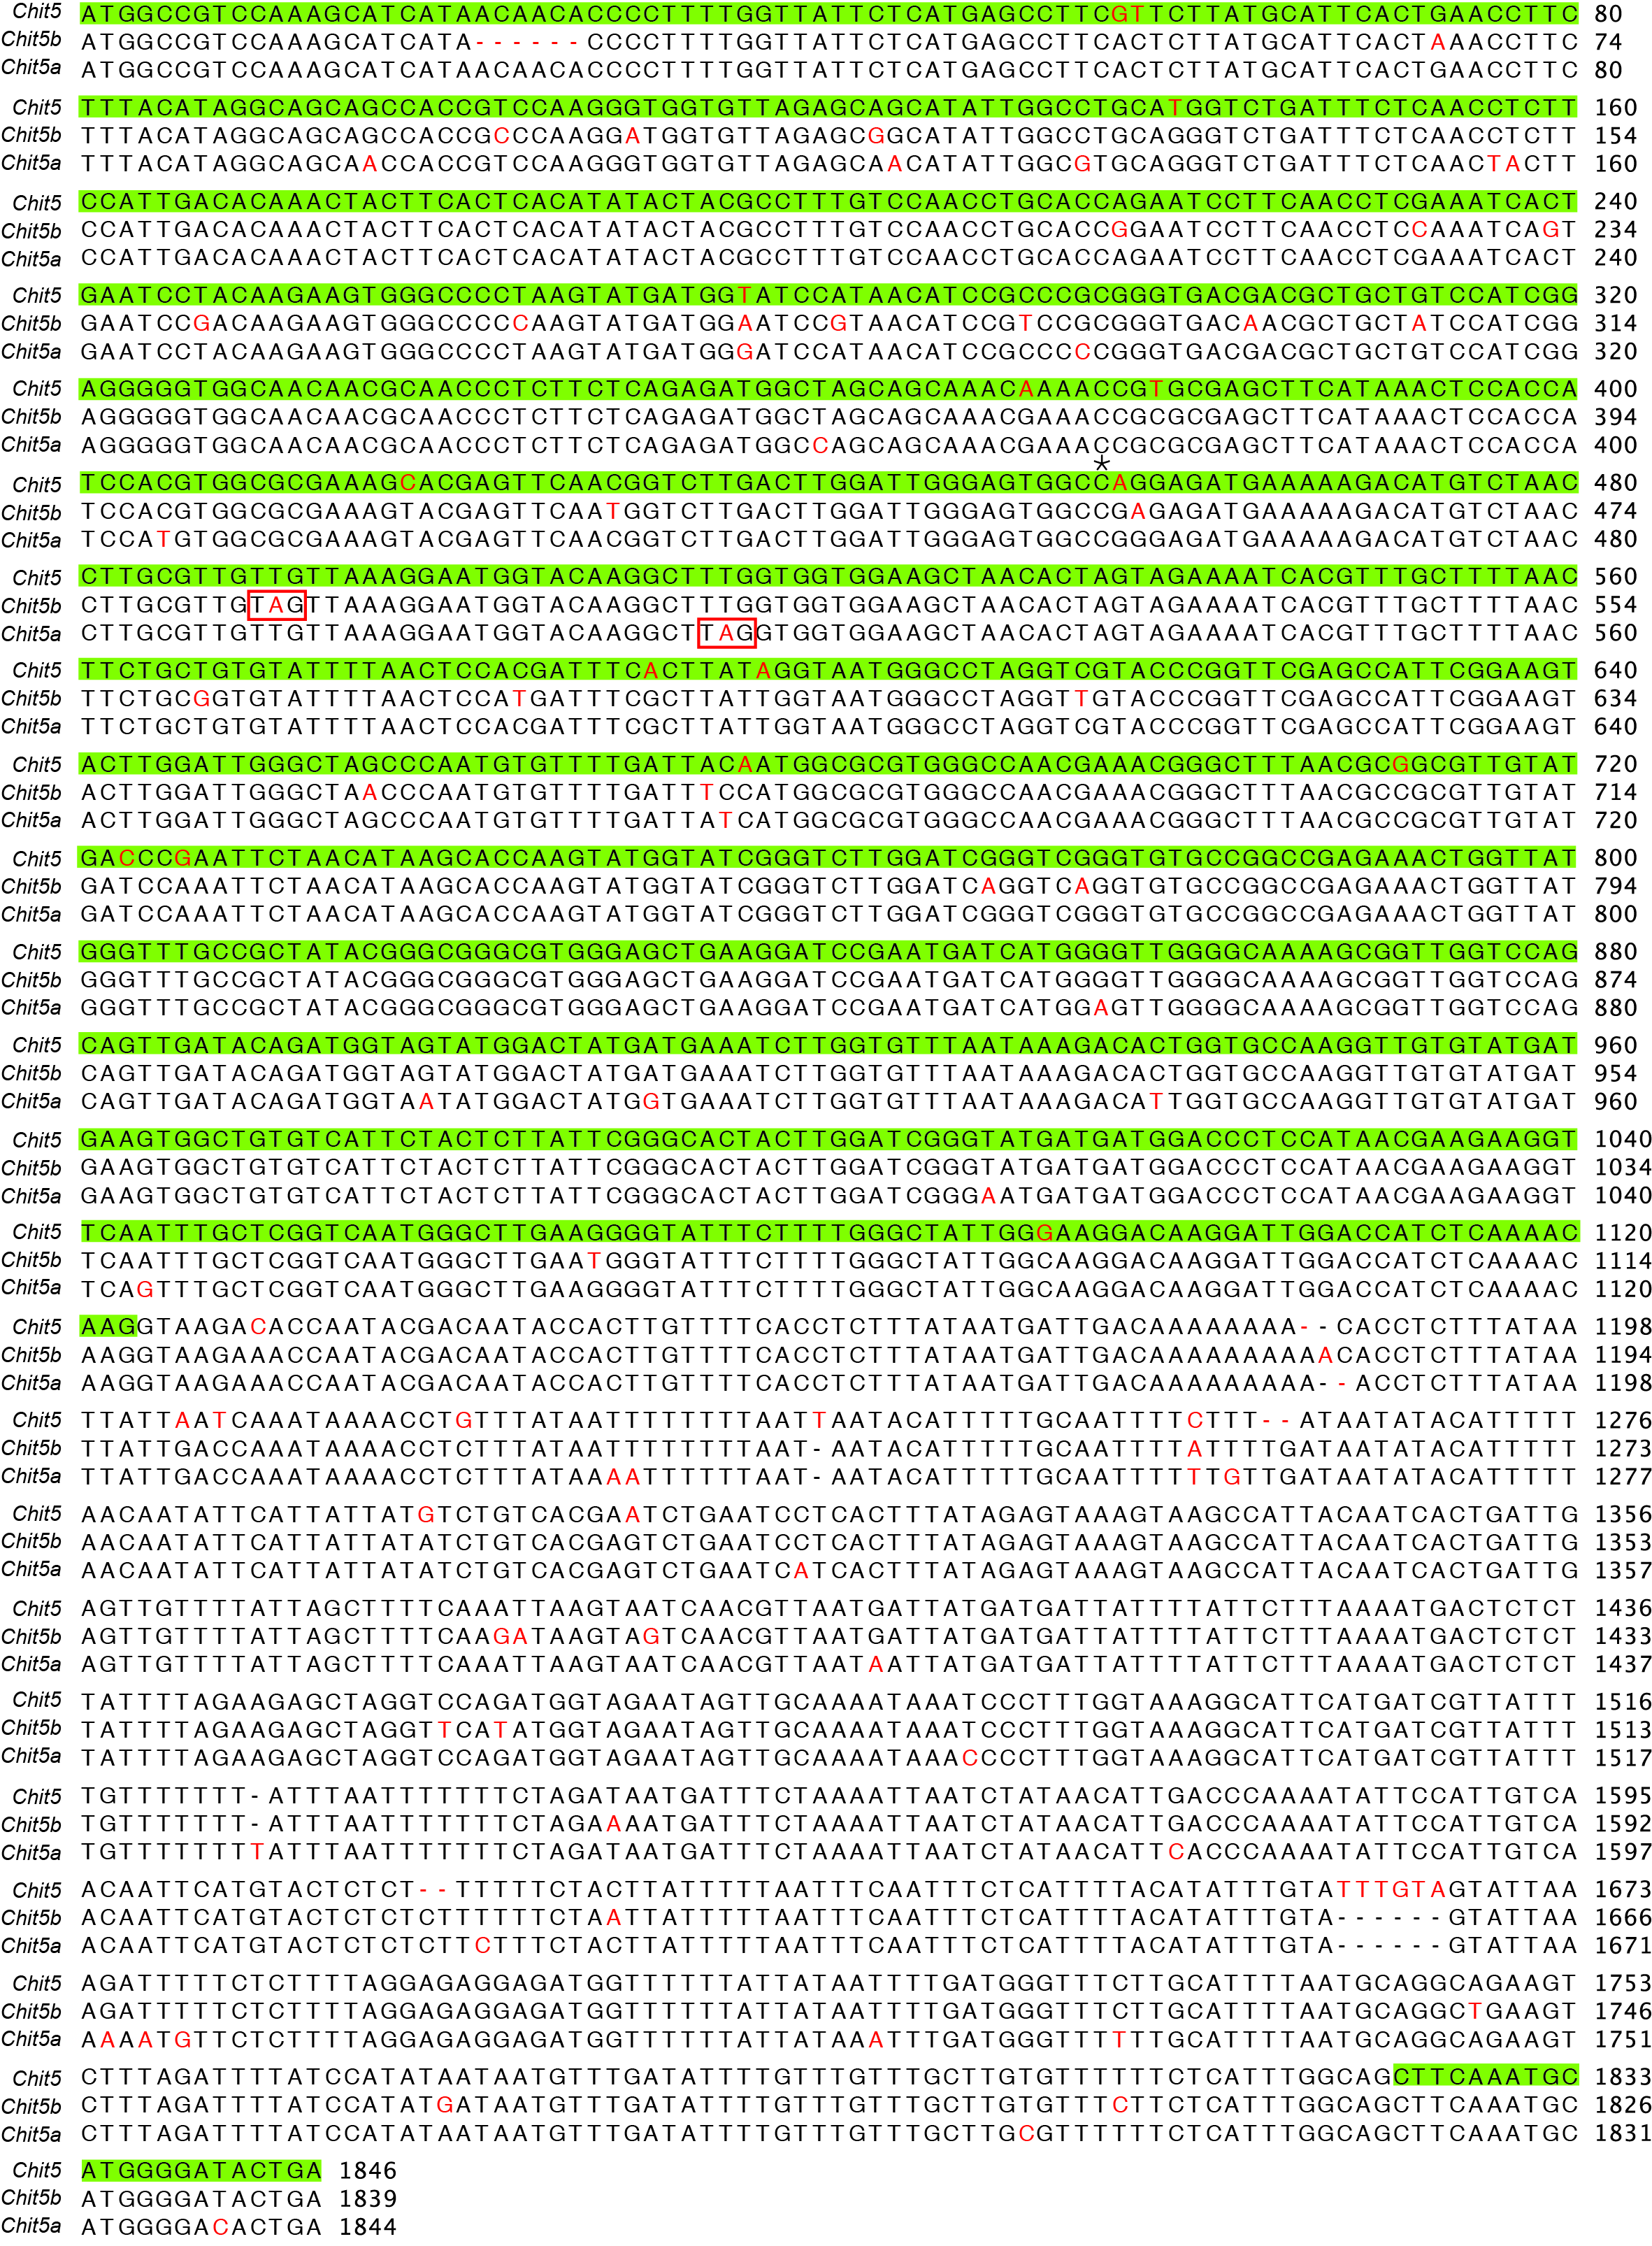

Supplement: supp [file elife-38874-supp-v1.zip › elife_poa_e38874_Figure_3_figure_supplement_2.tif]

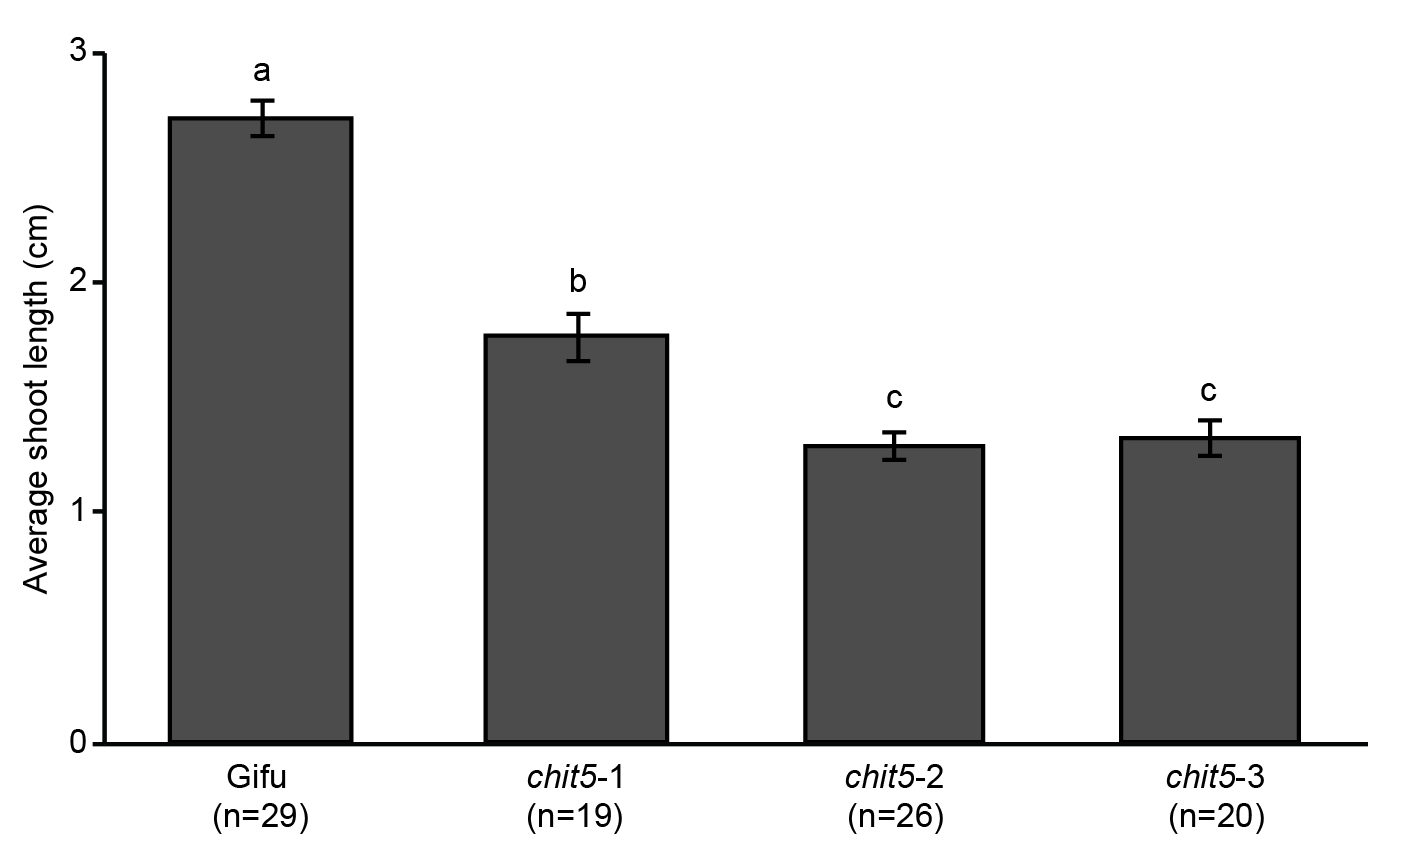

Supplement: supp [file elife-38874-supp-v1.zip › elife_poa_e38874_Figure_1_figure_supplement_1.tif]

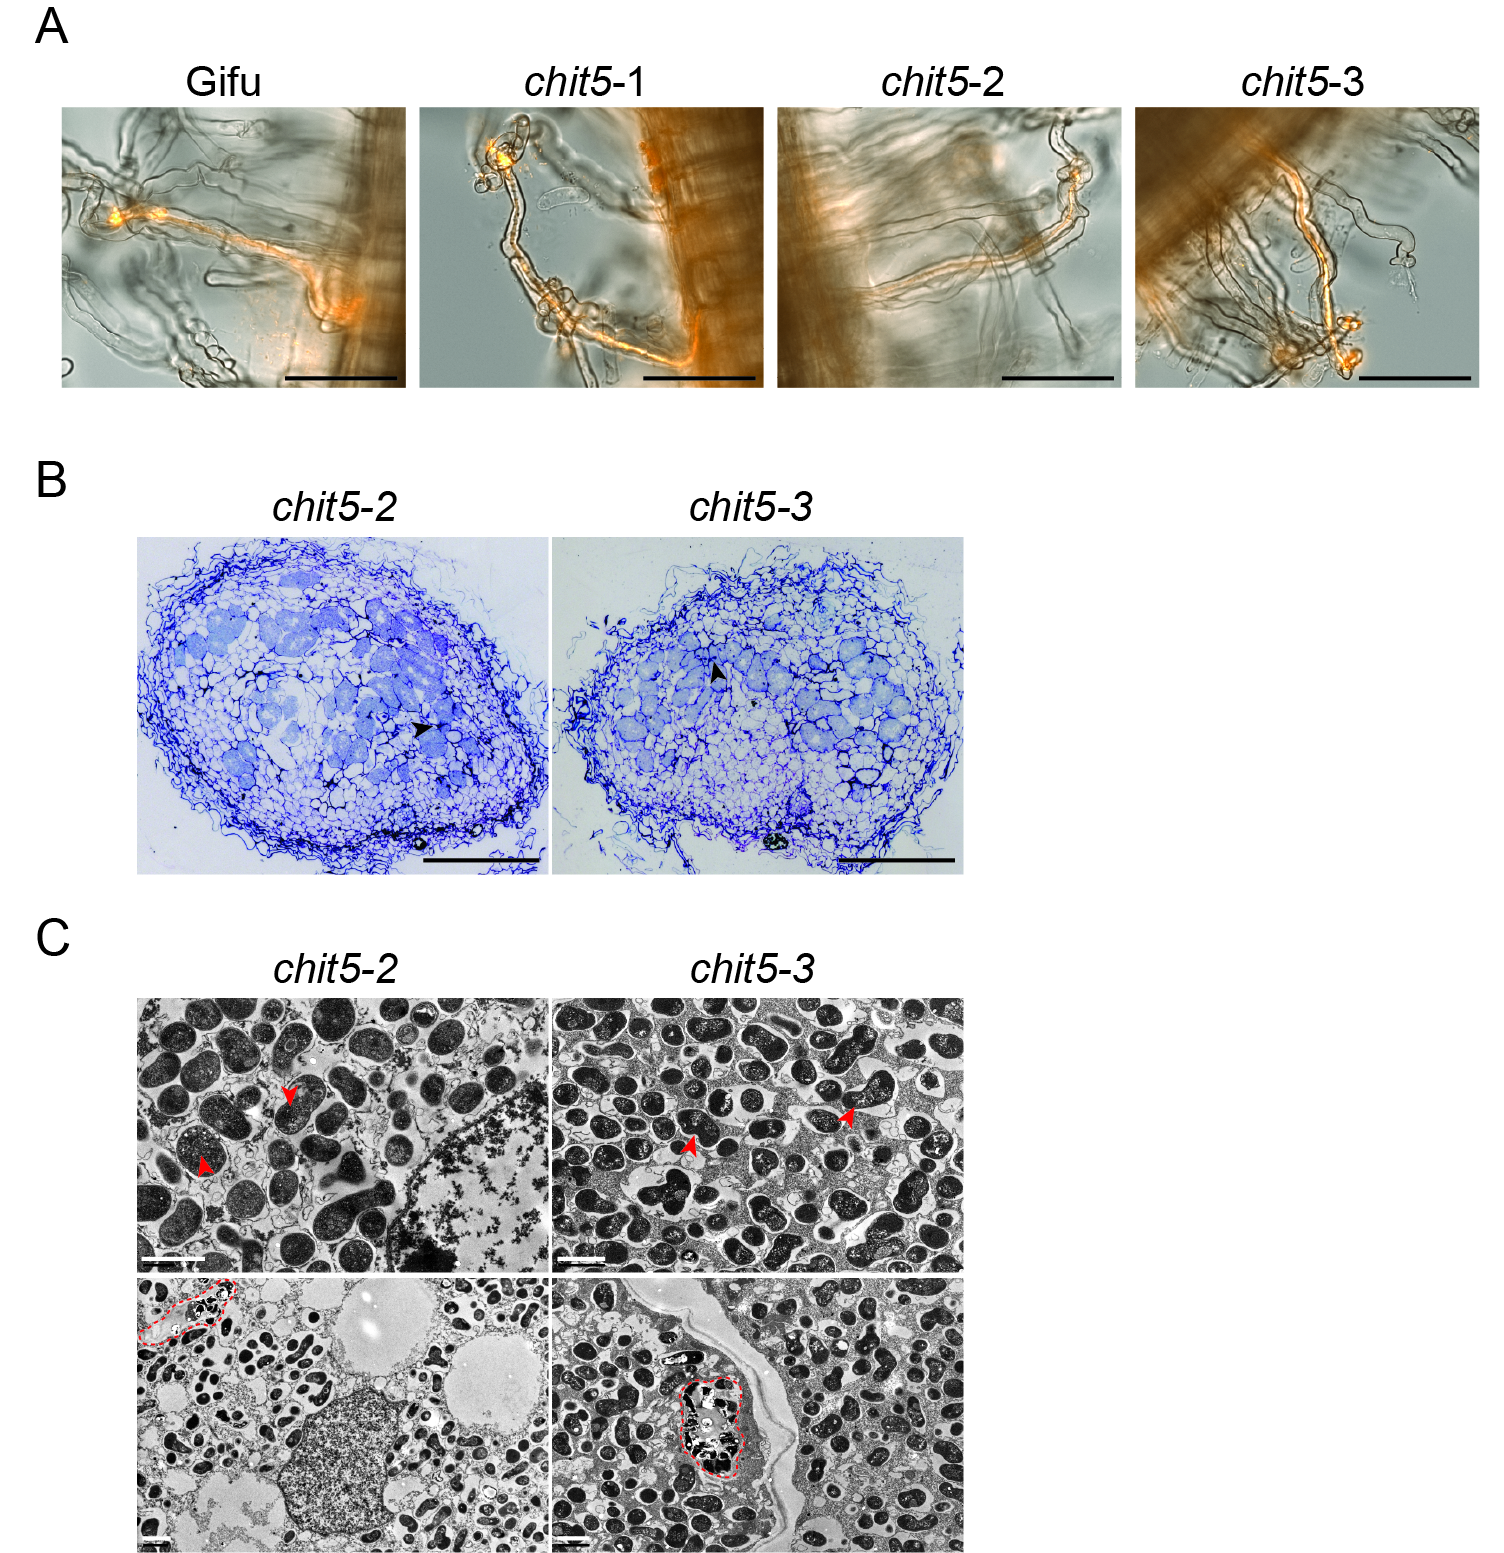

Supplement: supp [file elife-38874-supp-v1.zip › elife_poa_e38874_Figure_2_figure_supplement_1.tif]

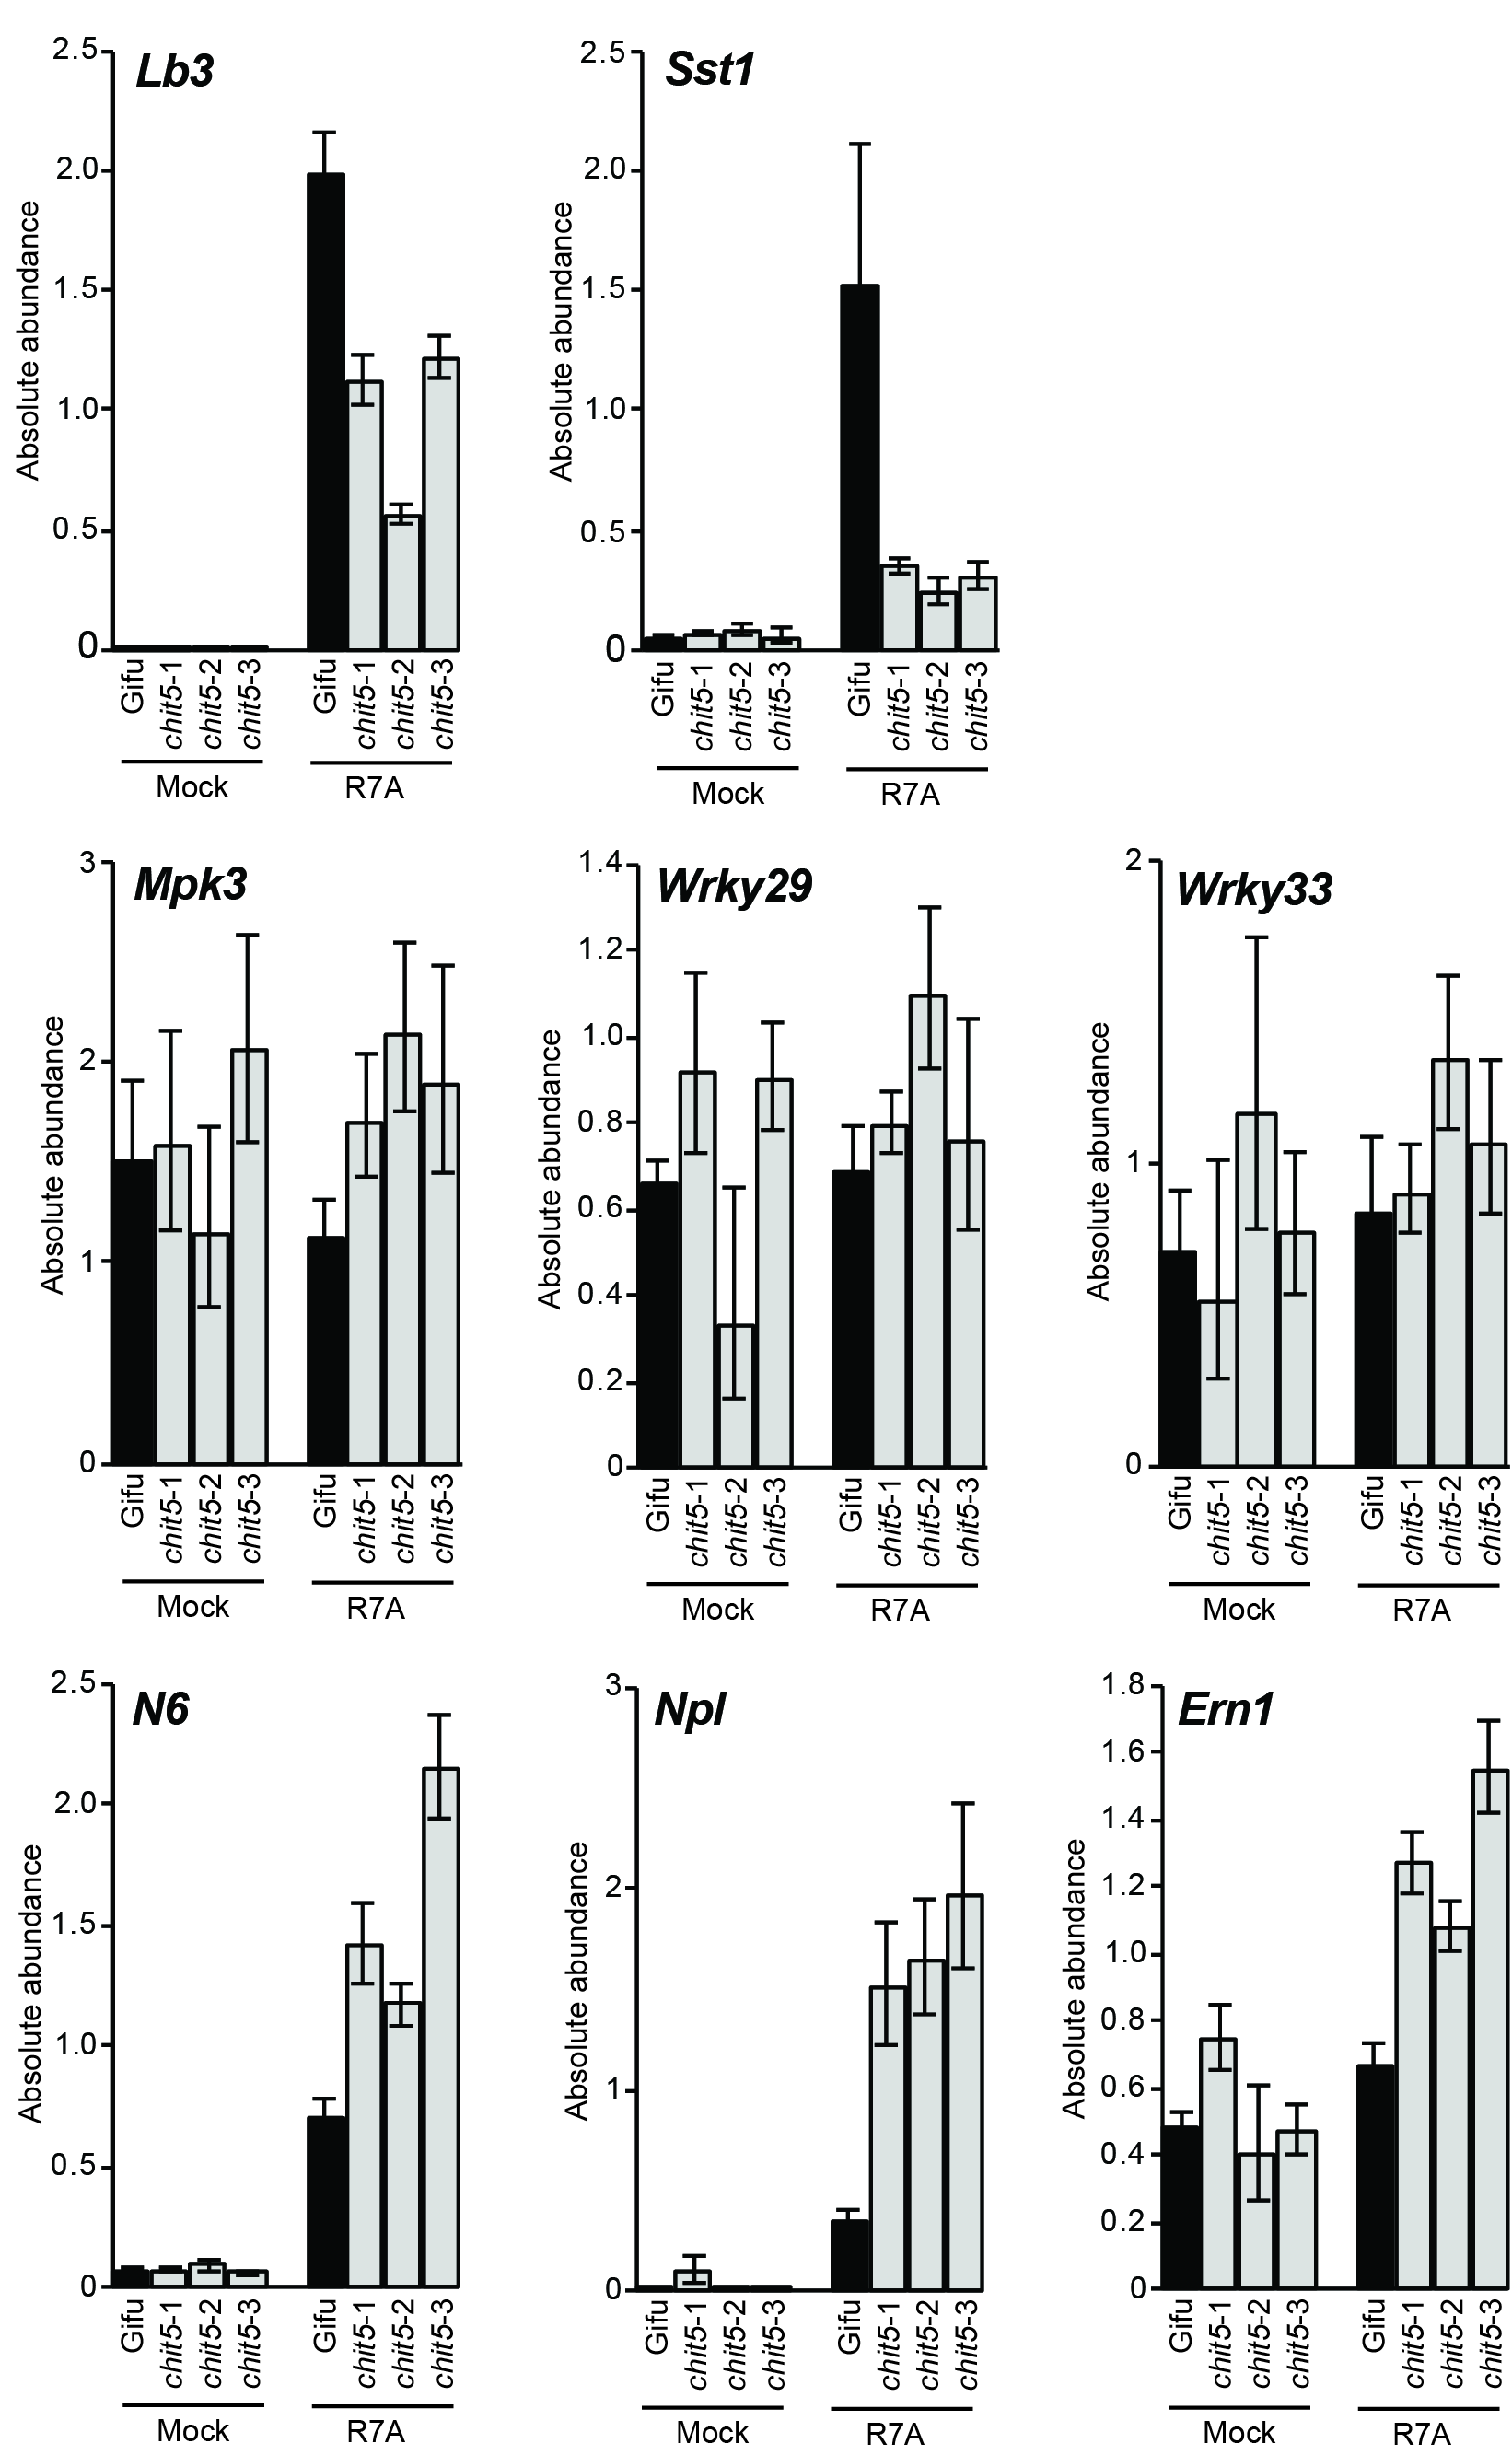

Supplement: supp [file elife-38874-supp-v1.zip › elife_poa_e38874_Figure_1_figure_supplement_3.tif]

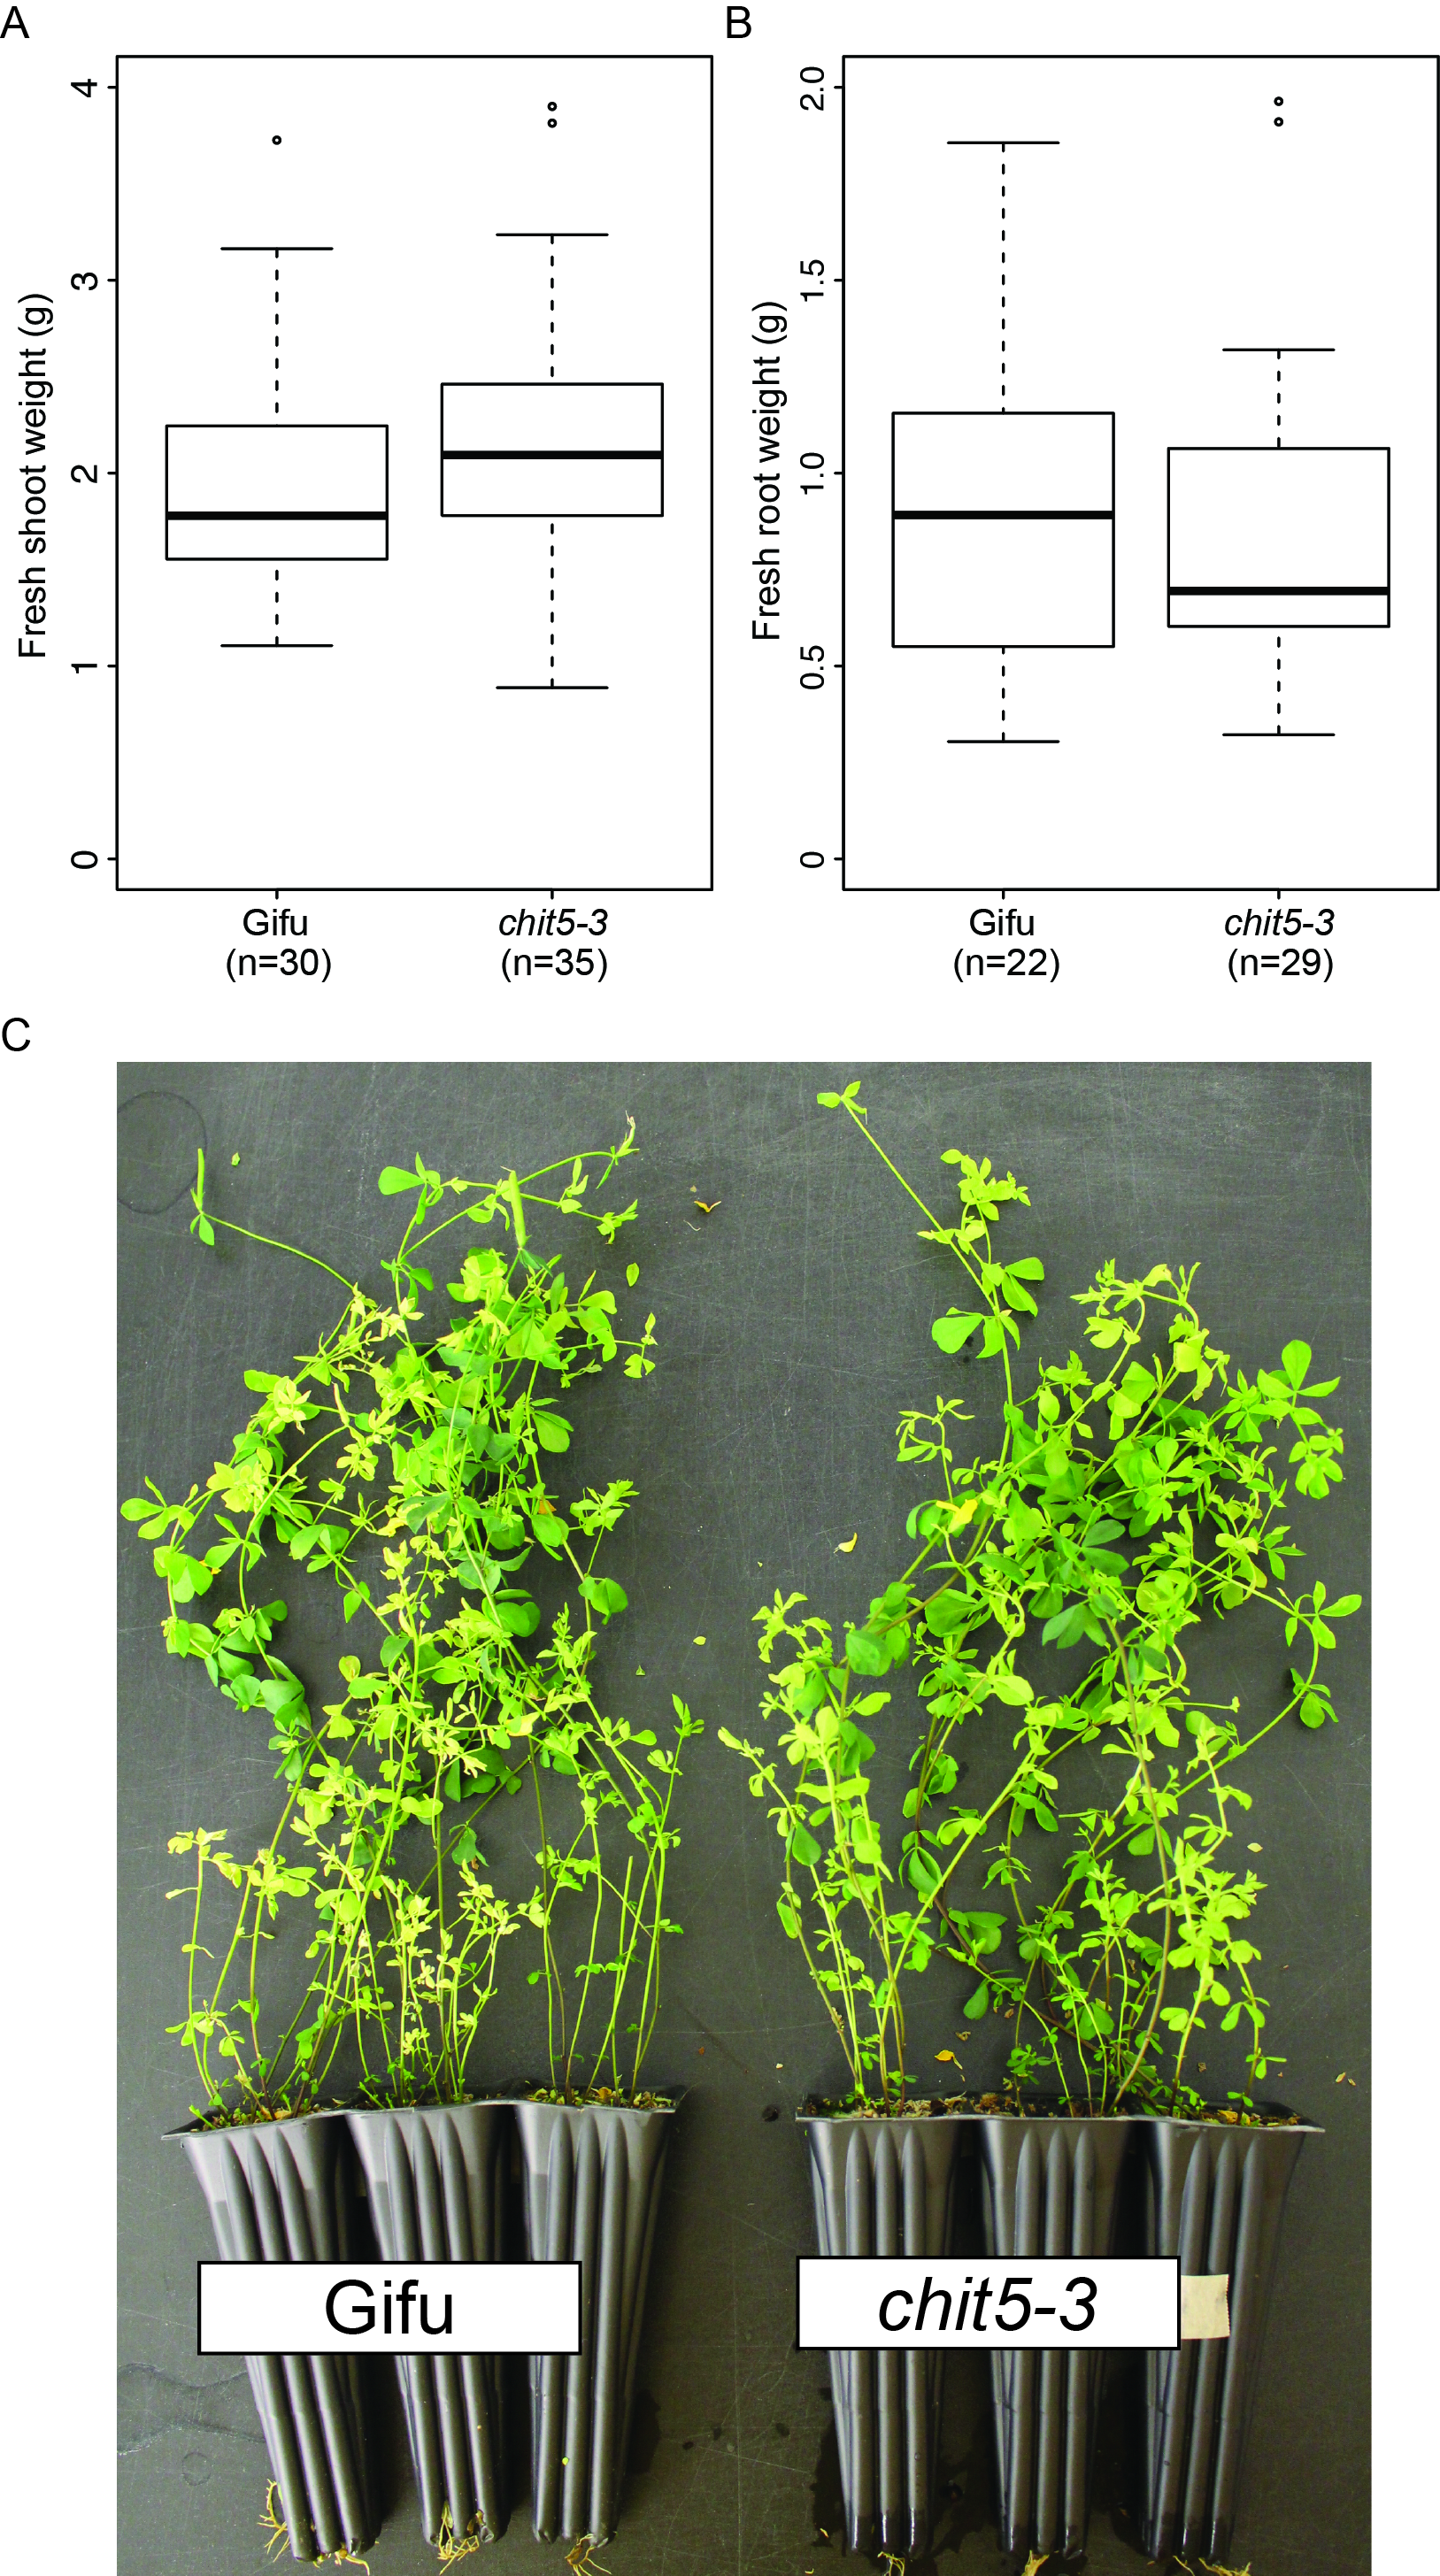

Supplement: supp [file elife-38874-supp-v1.zip › elife_poa_e38874_Figure_1_figure_supplement_2.tif]

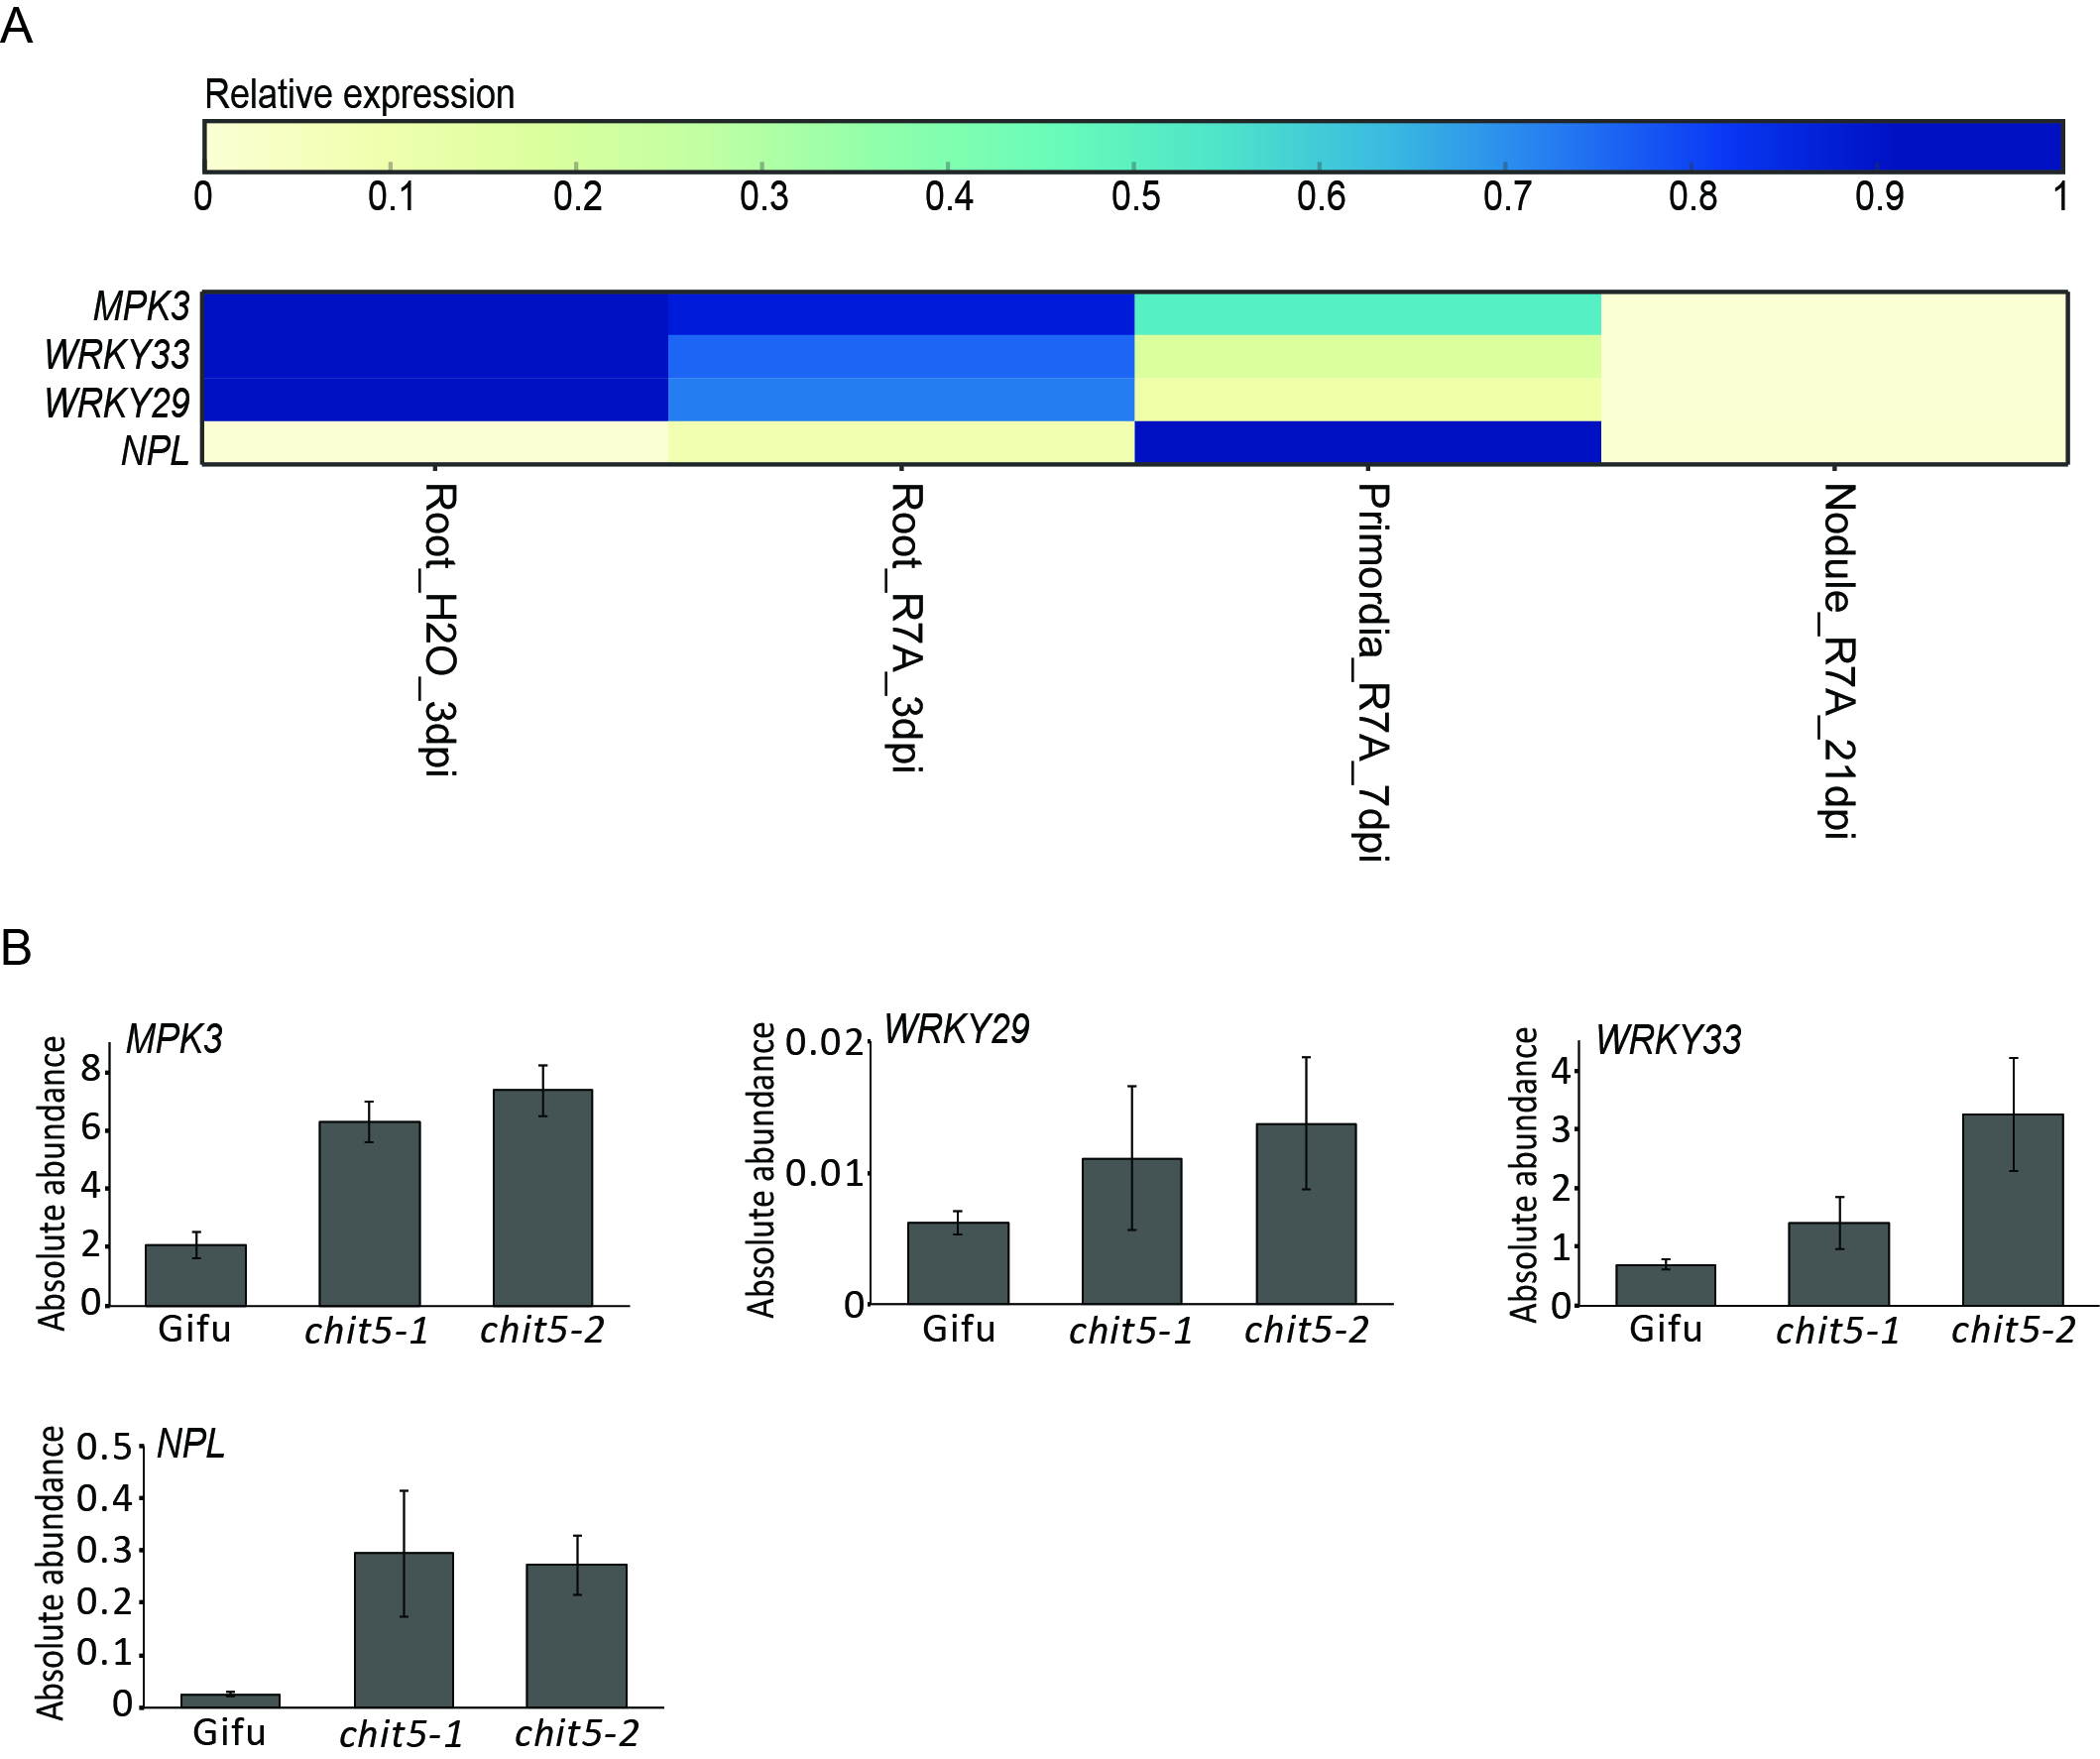

Supplement: supp [file elife-38874-supp-v1.zip › elife_poa_e38874_Figure_1_figure_supplement_4.tif]

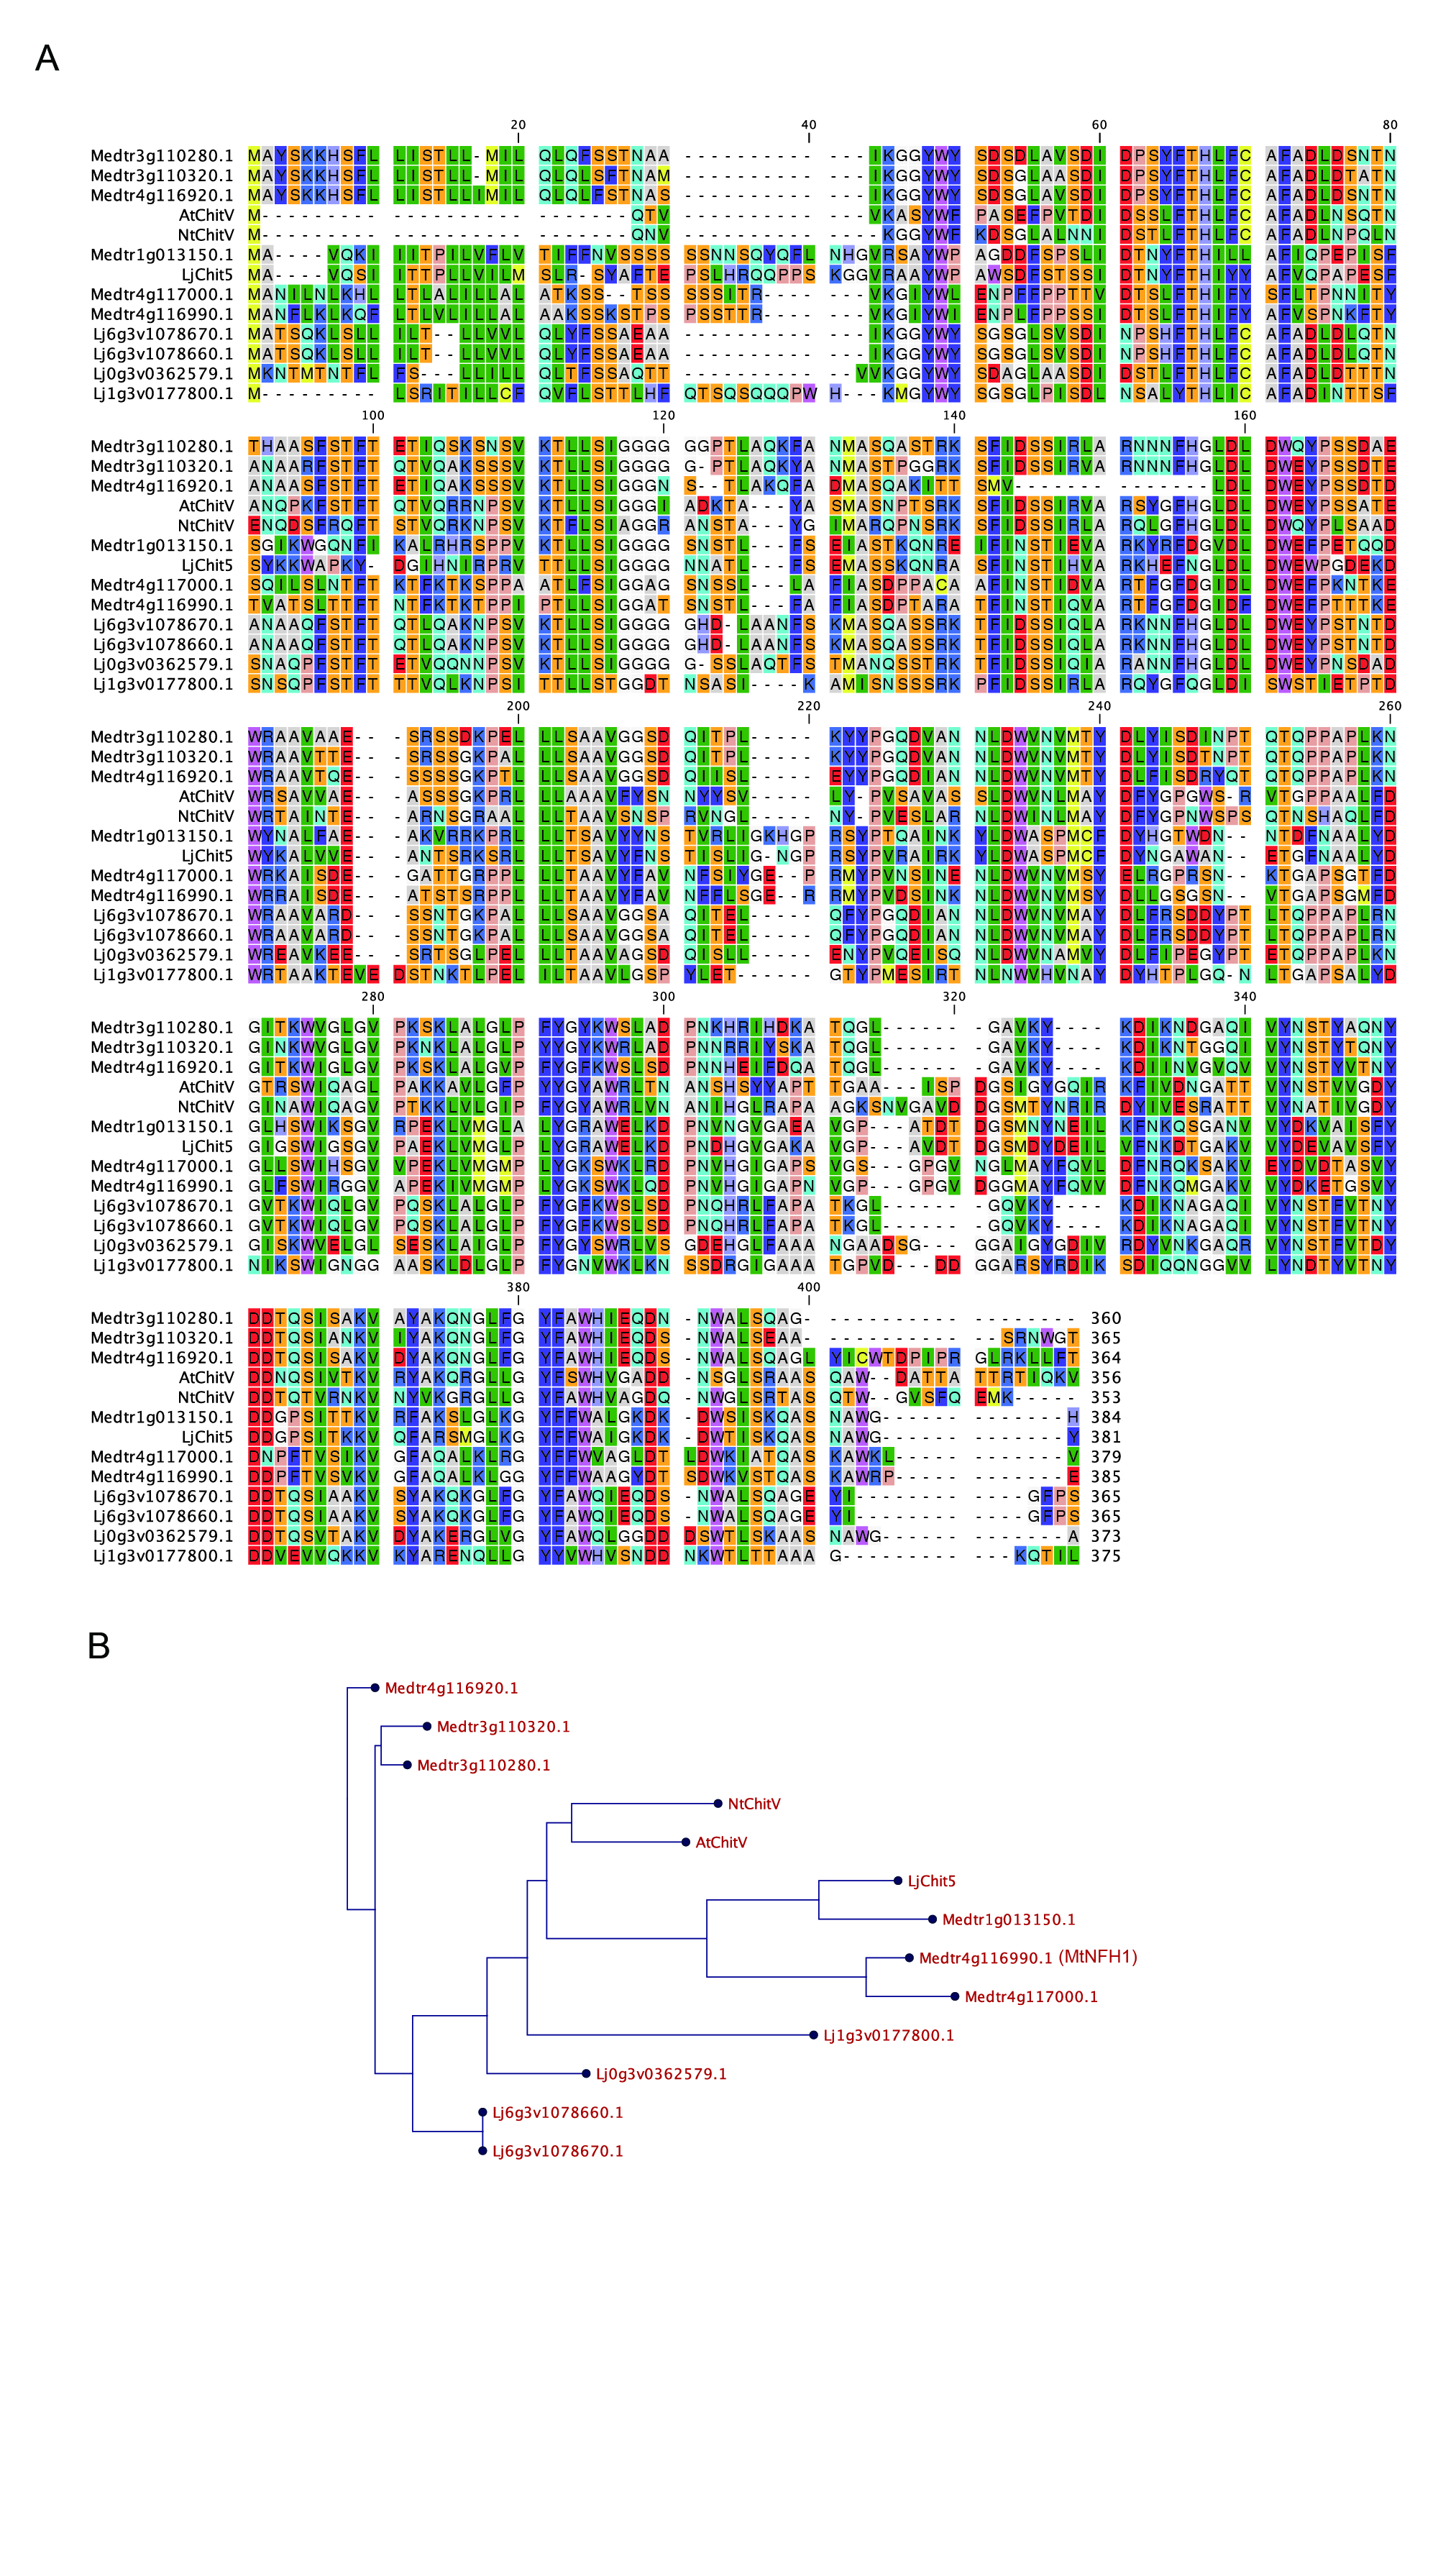

Supplement: supp [file elife-38874-supp-v1.zip › elife_poa_e38874_Figure_4_figure_supplement_6.tif]

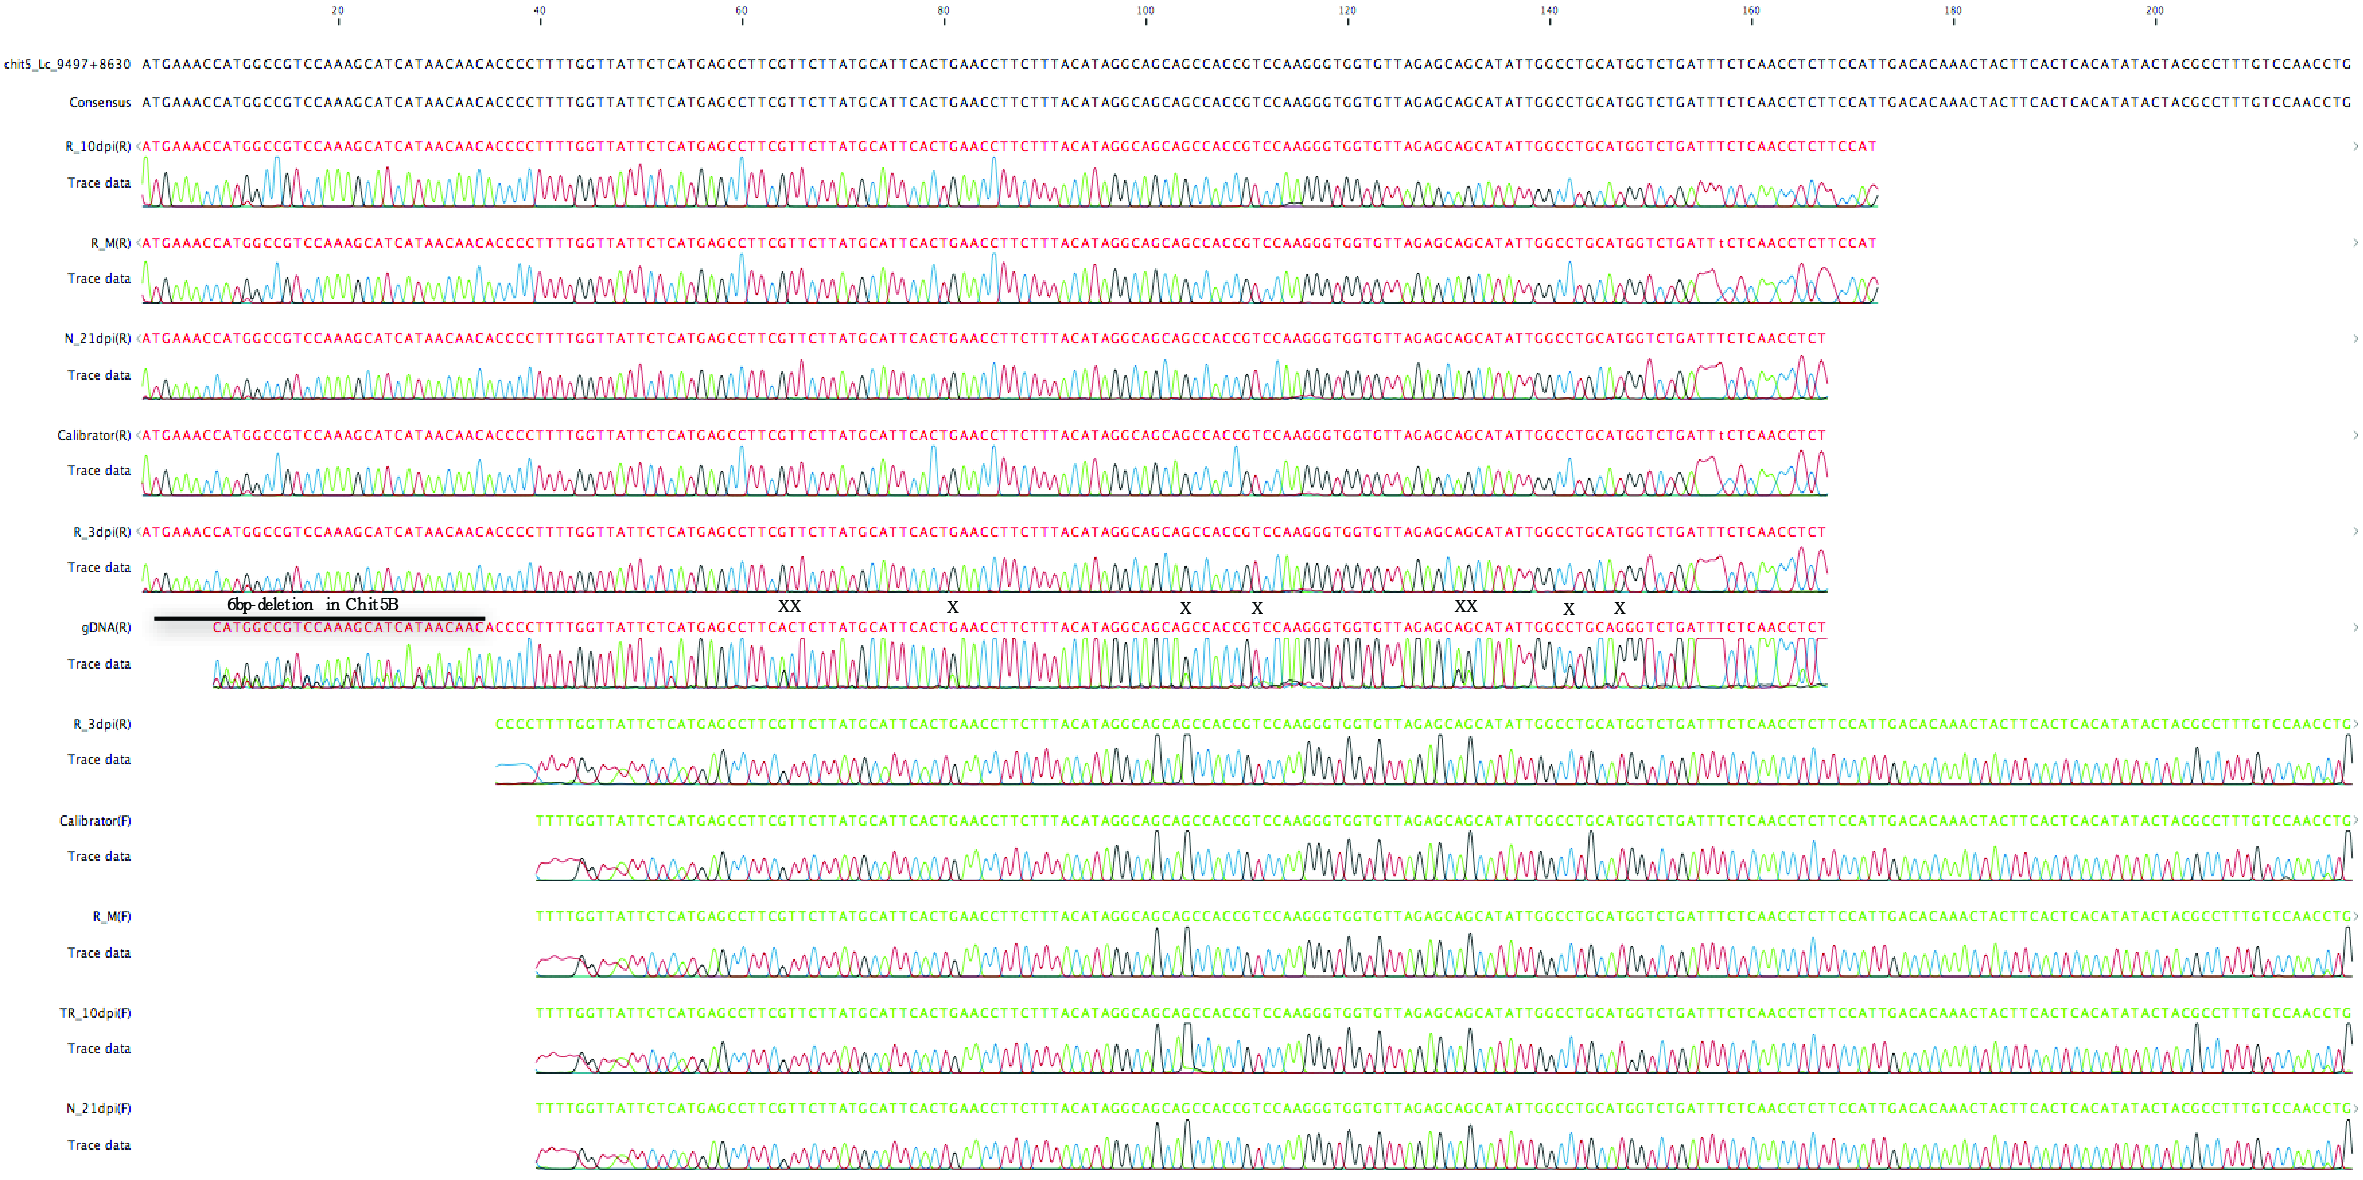

Supplement: supp [file elife-38874-supp-v1.zip › elife_poa_e38874_Figure_4_figure_supplement_7.tif]

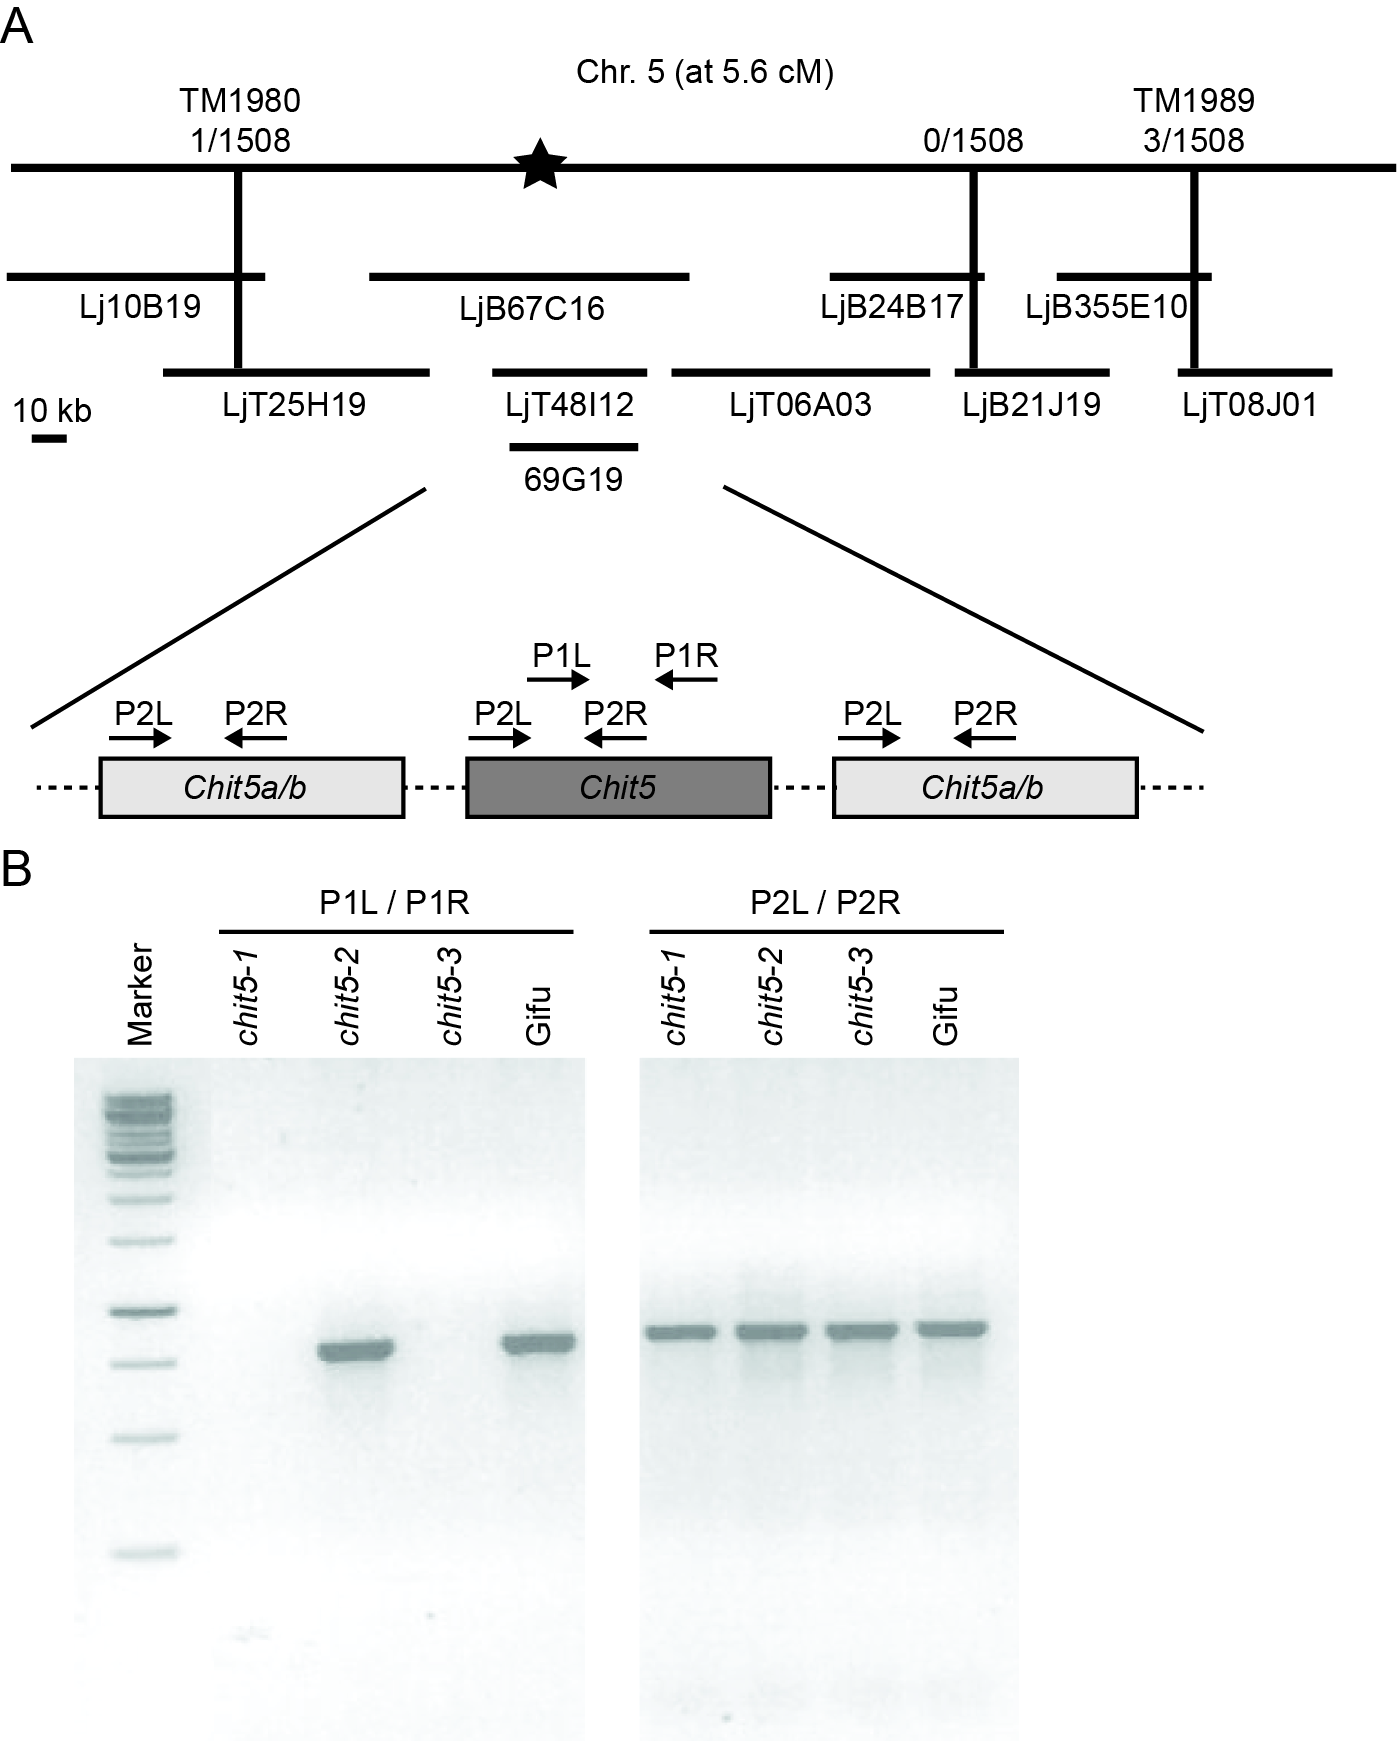

Supplement: supp [file elife-38874-supp-v1.zip › elife_poa_e38874_Figure_3_figure_supplement_1.tif]

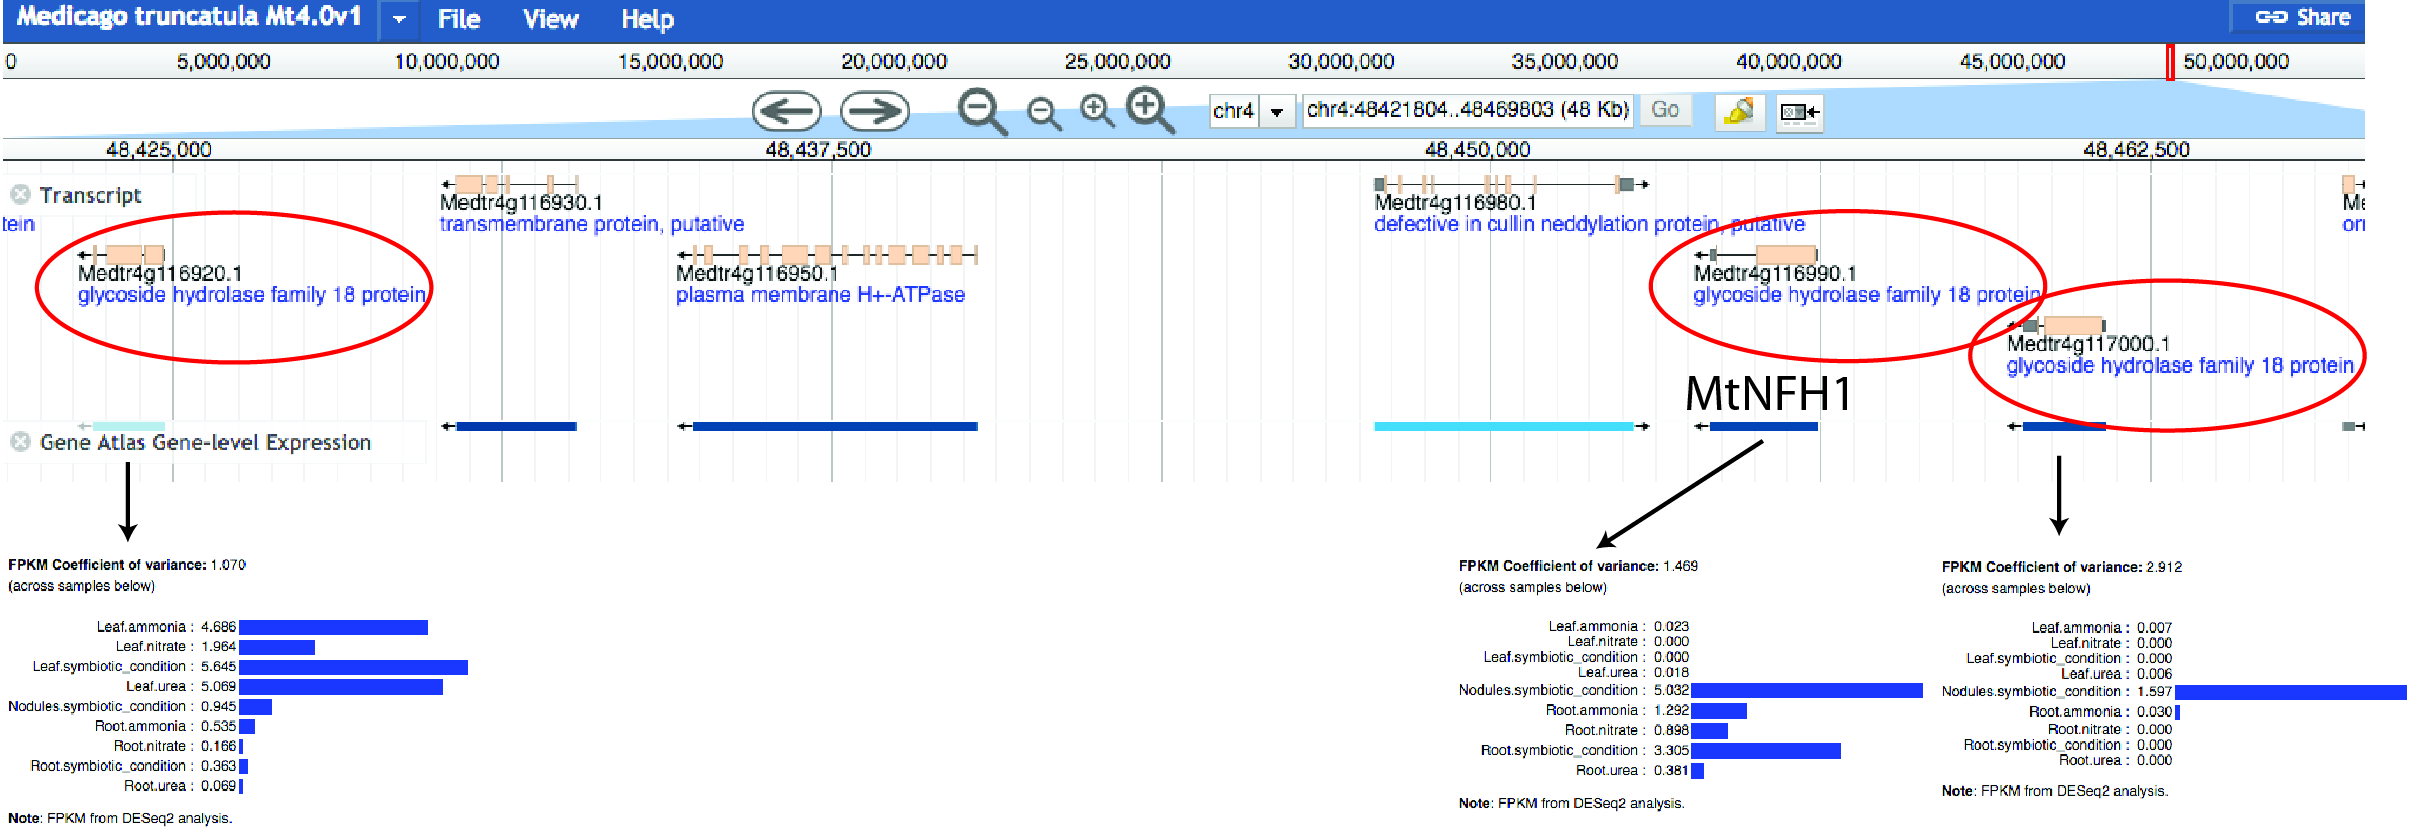

Supplement: supp [file elife-38874-supp-v1.zip › elife_poa_e38874_Figure_4_figure_supplement_5.tif]

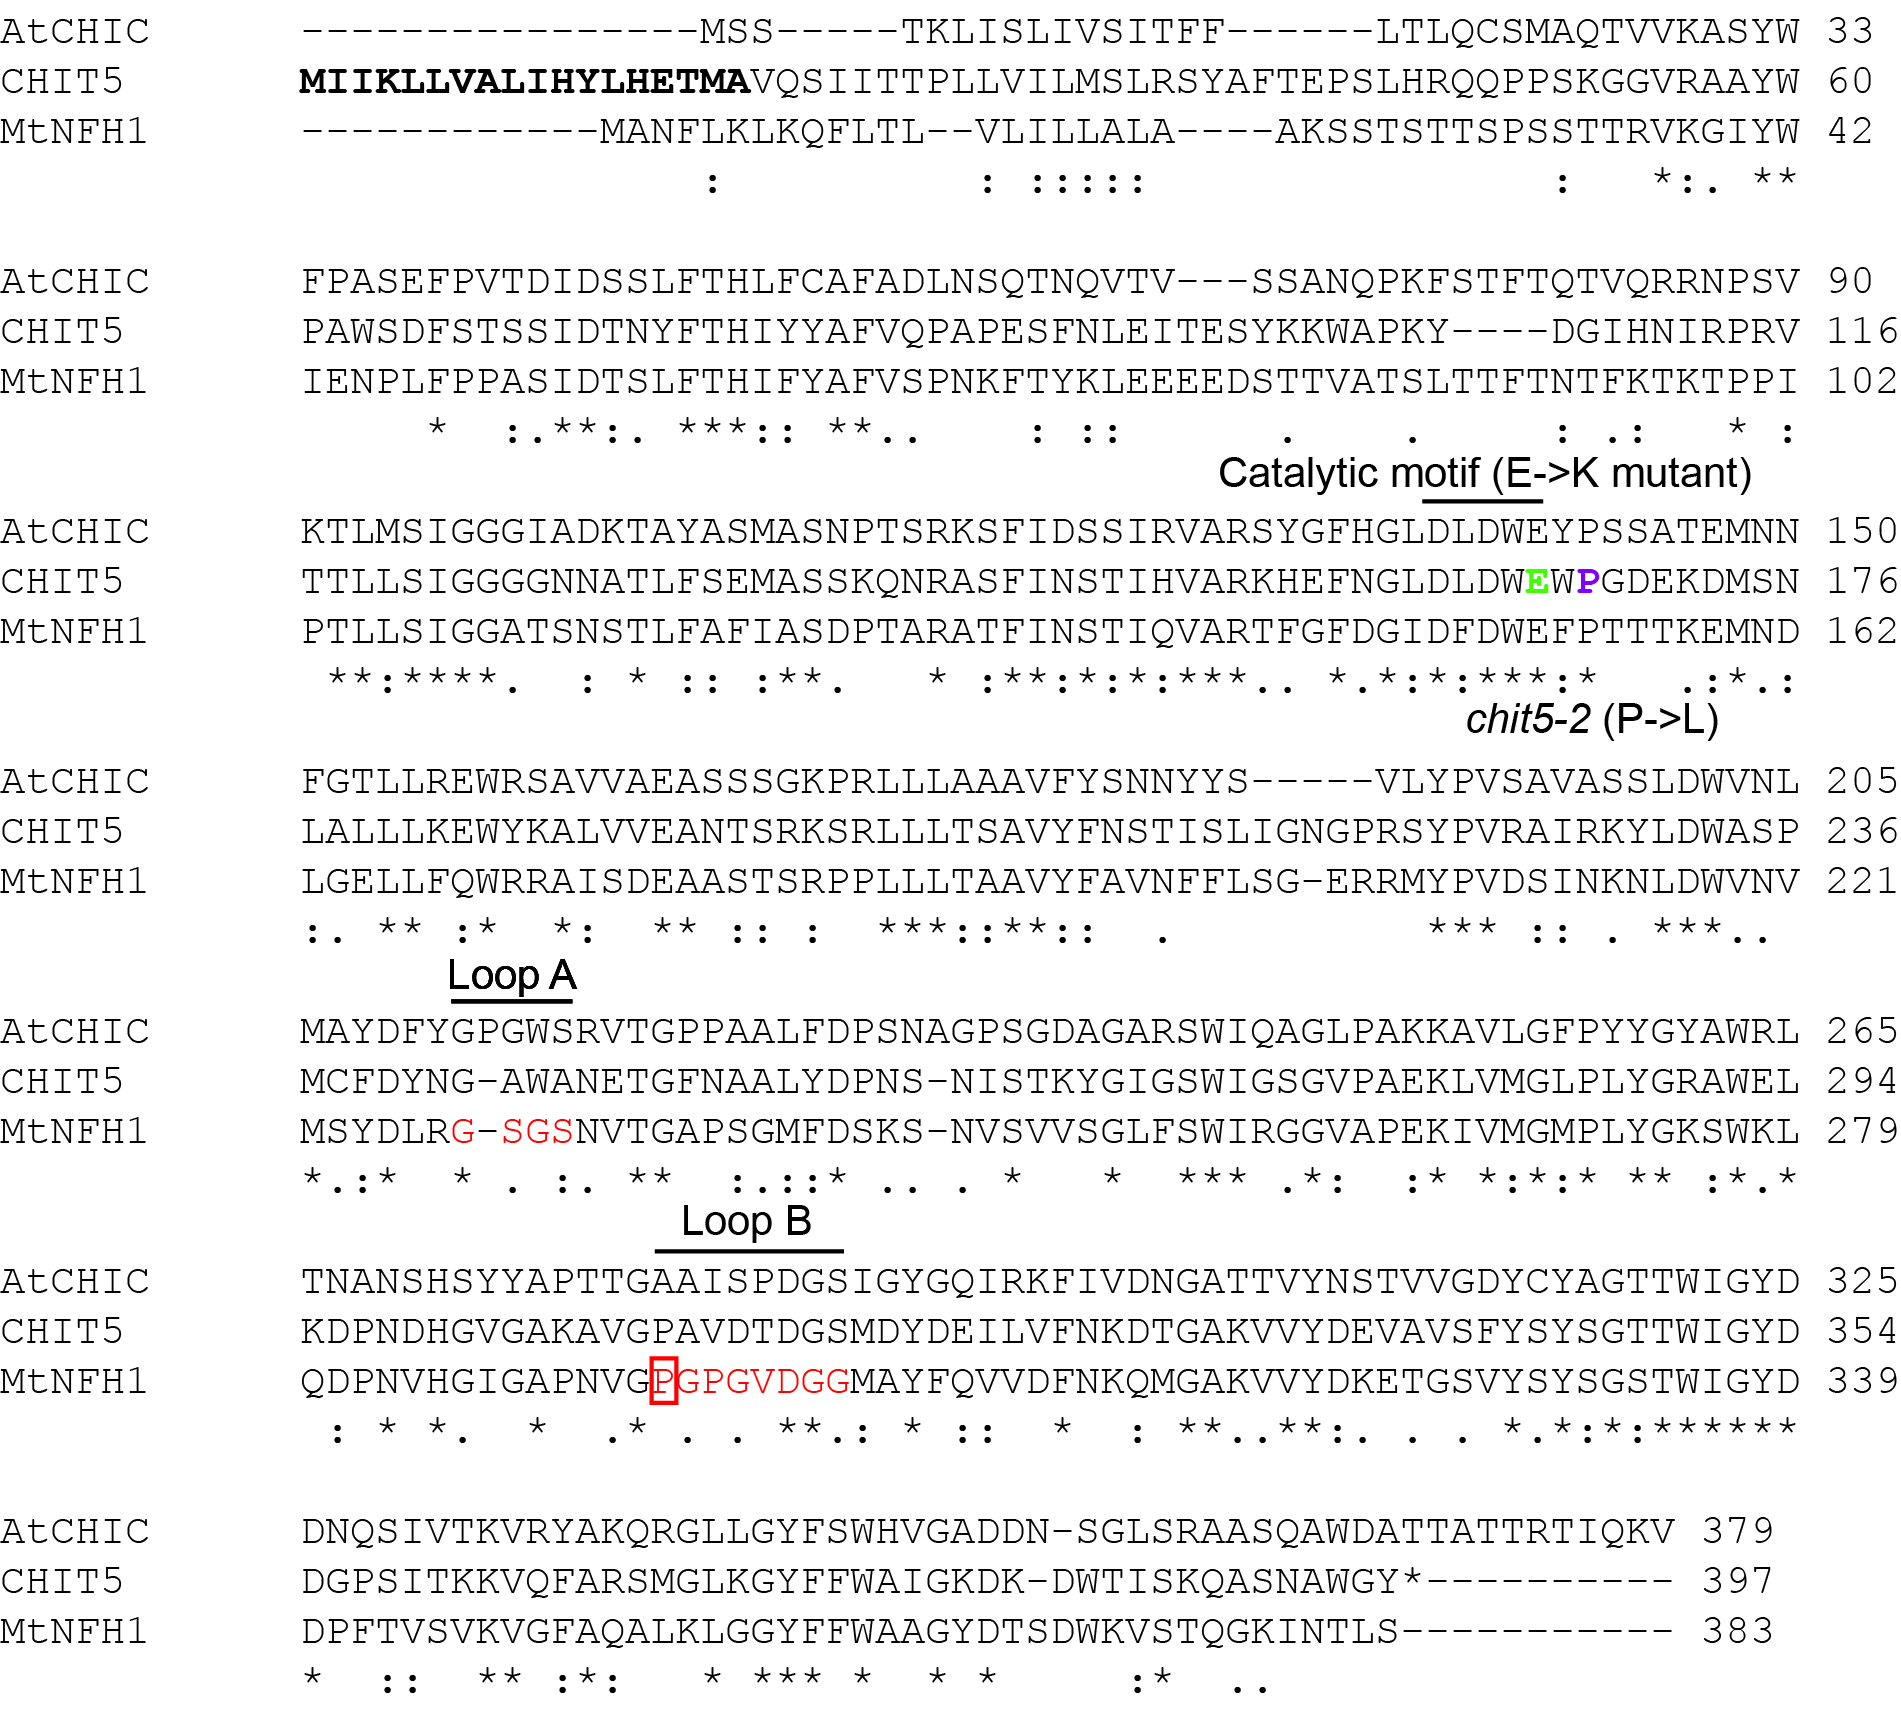

Supplement: supp [file elife-38874-supp-v1.zip › elife_poa_e38874_Figure_3_figure_supplement_5.tif]

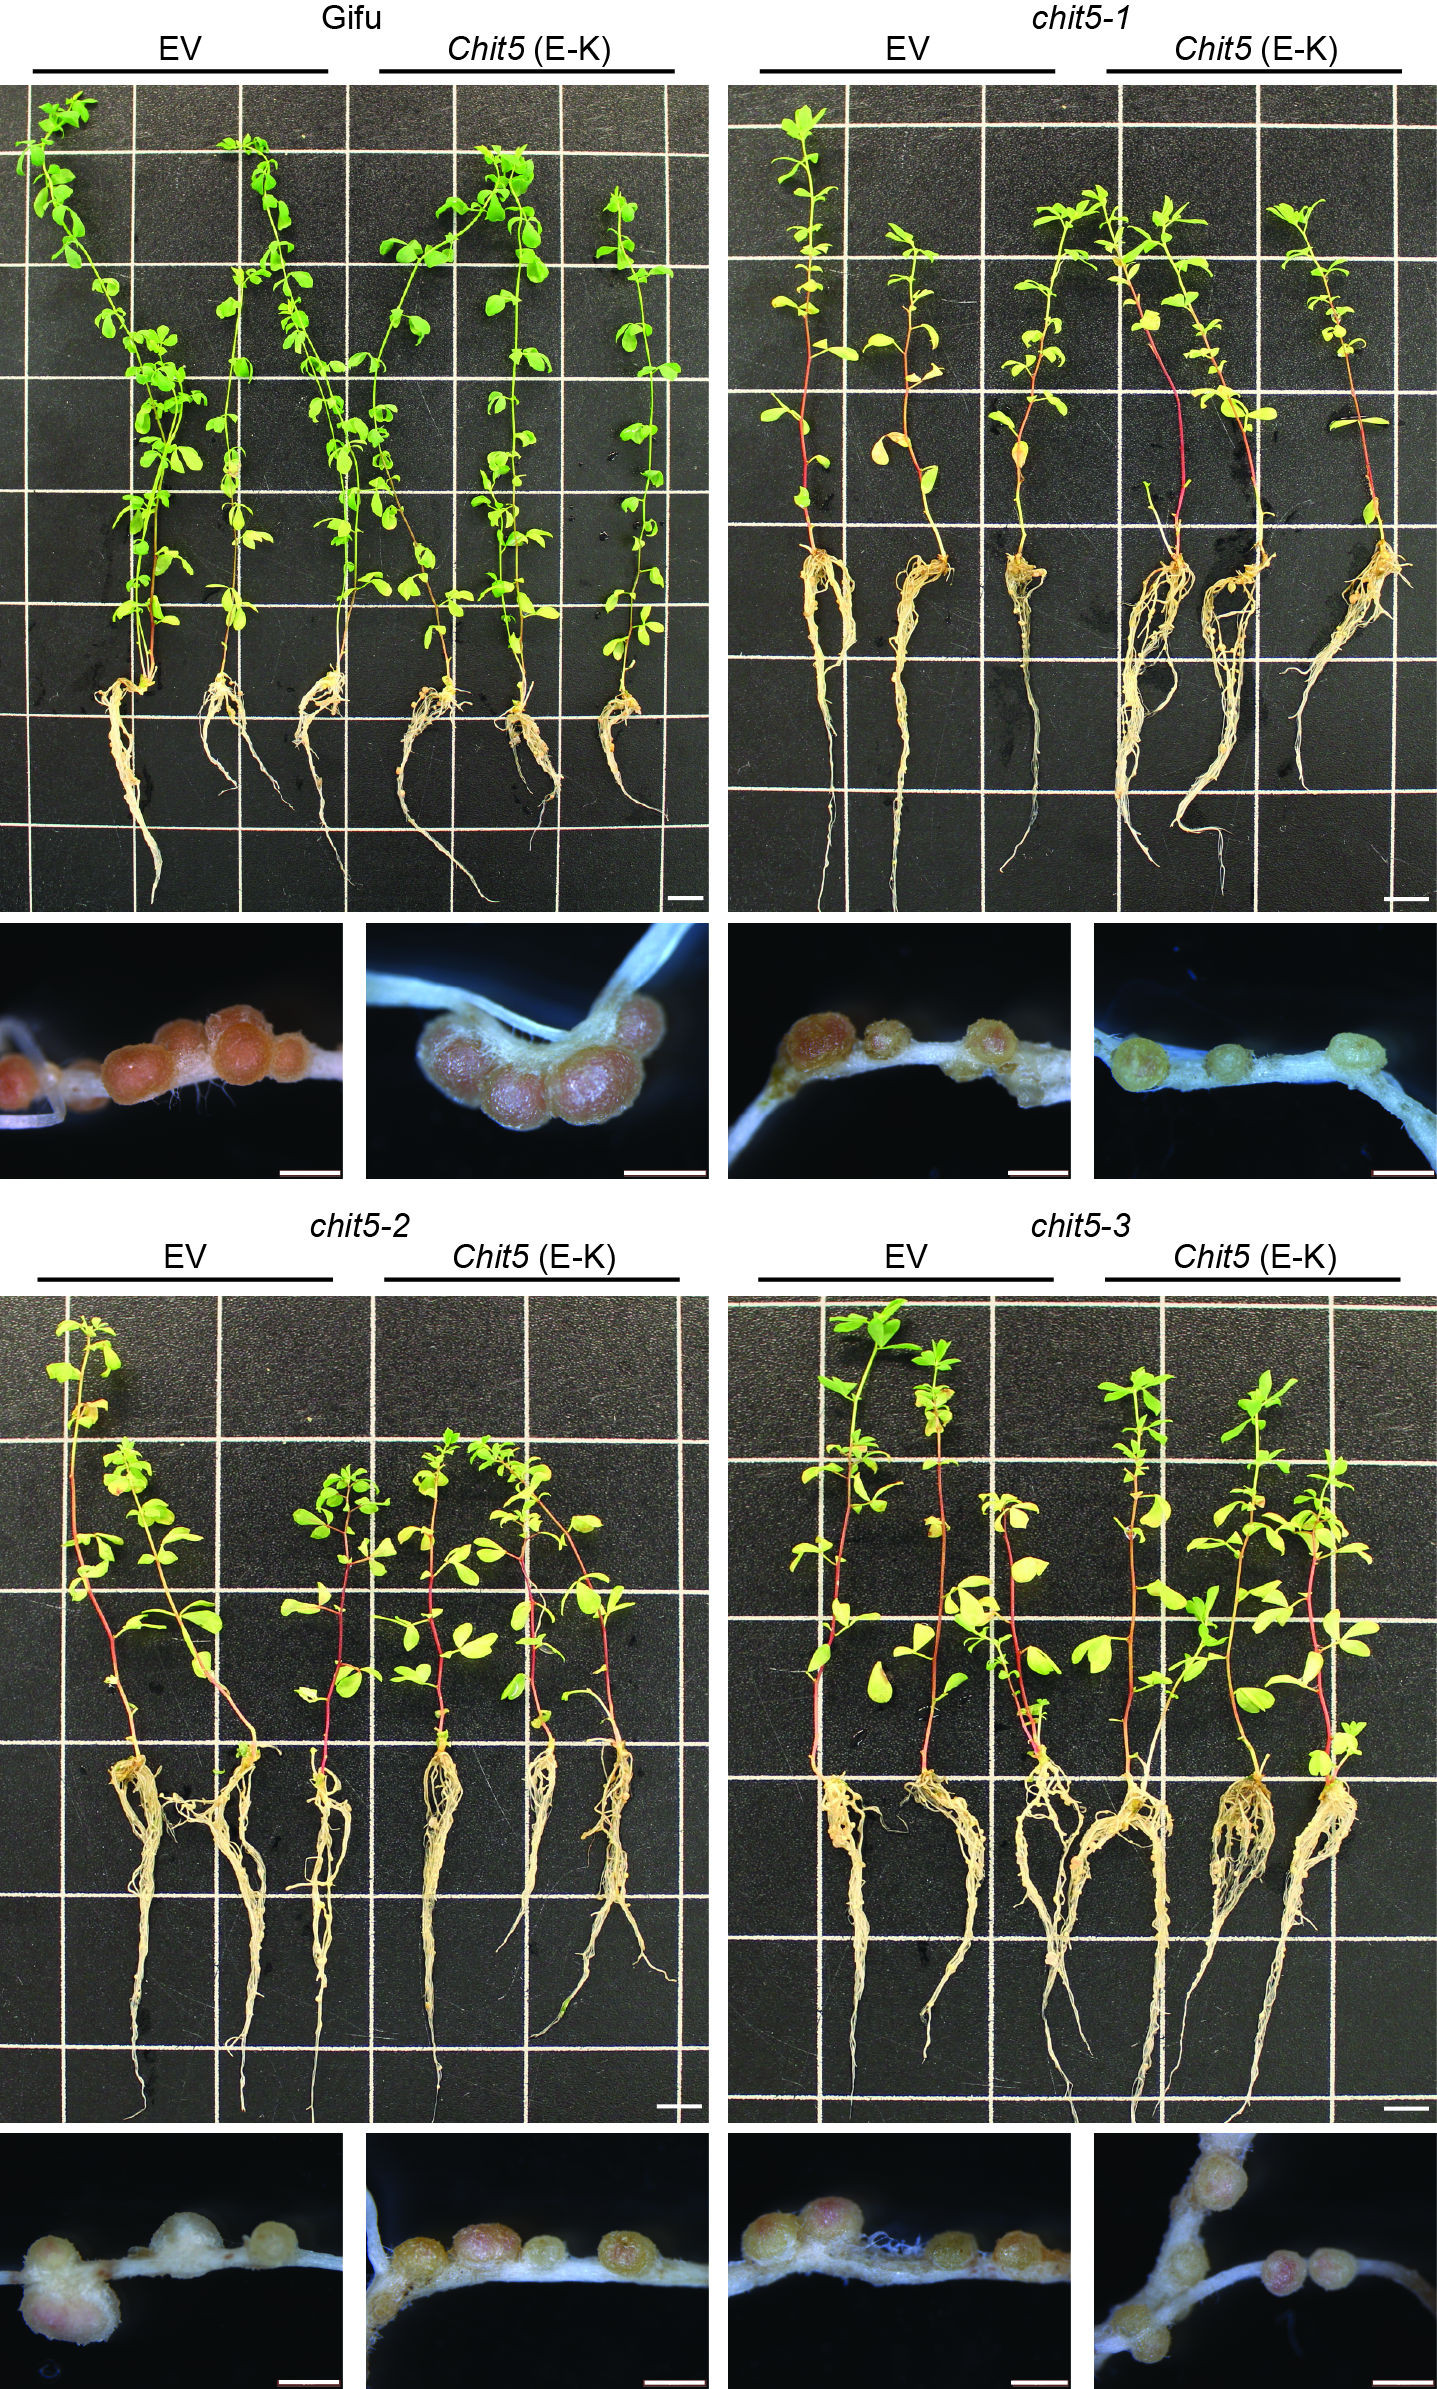

Supplement: supp [file elife-38874-supp-v1.zip › elife_poa_e38874_Figure_3_figure_supplement_6.tif]

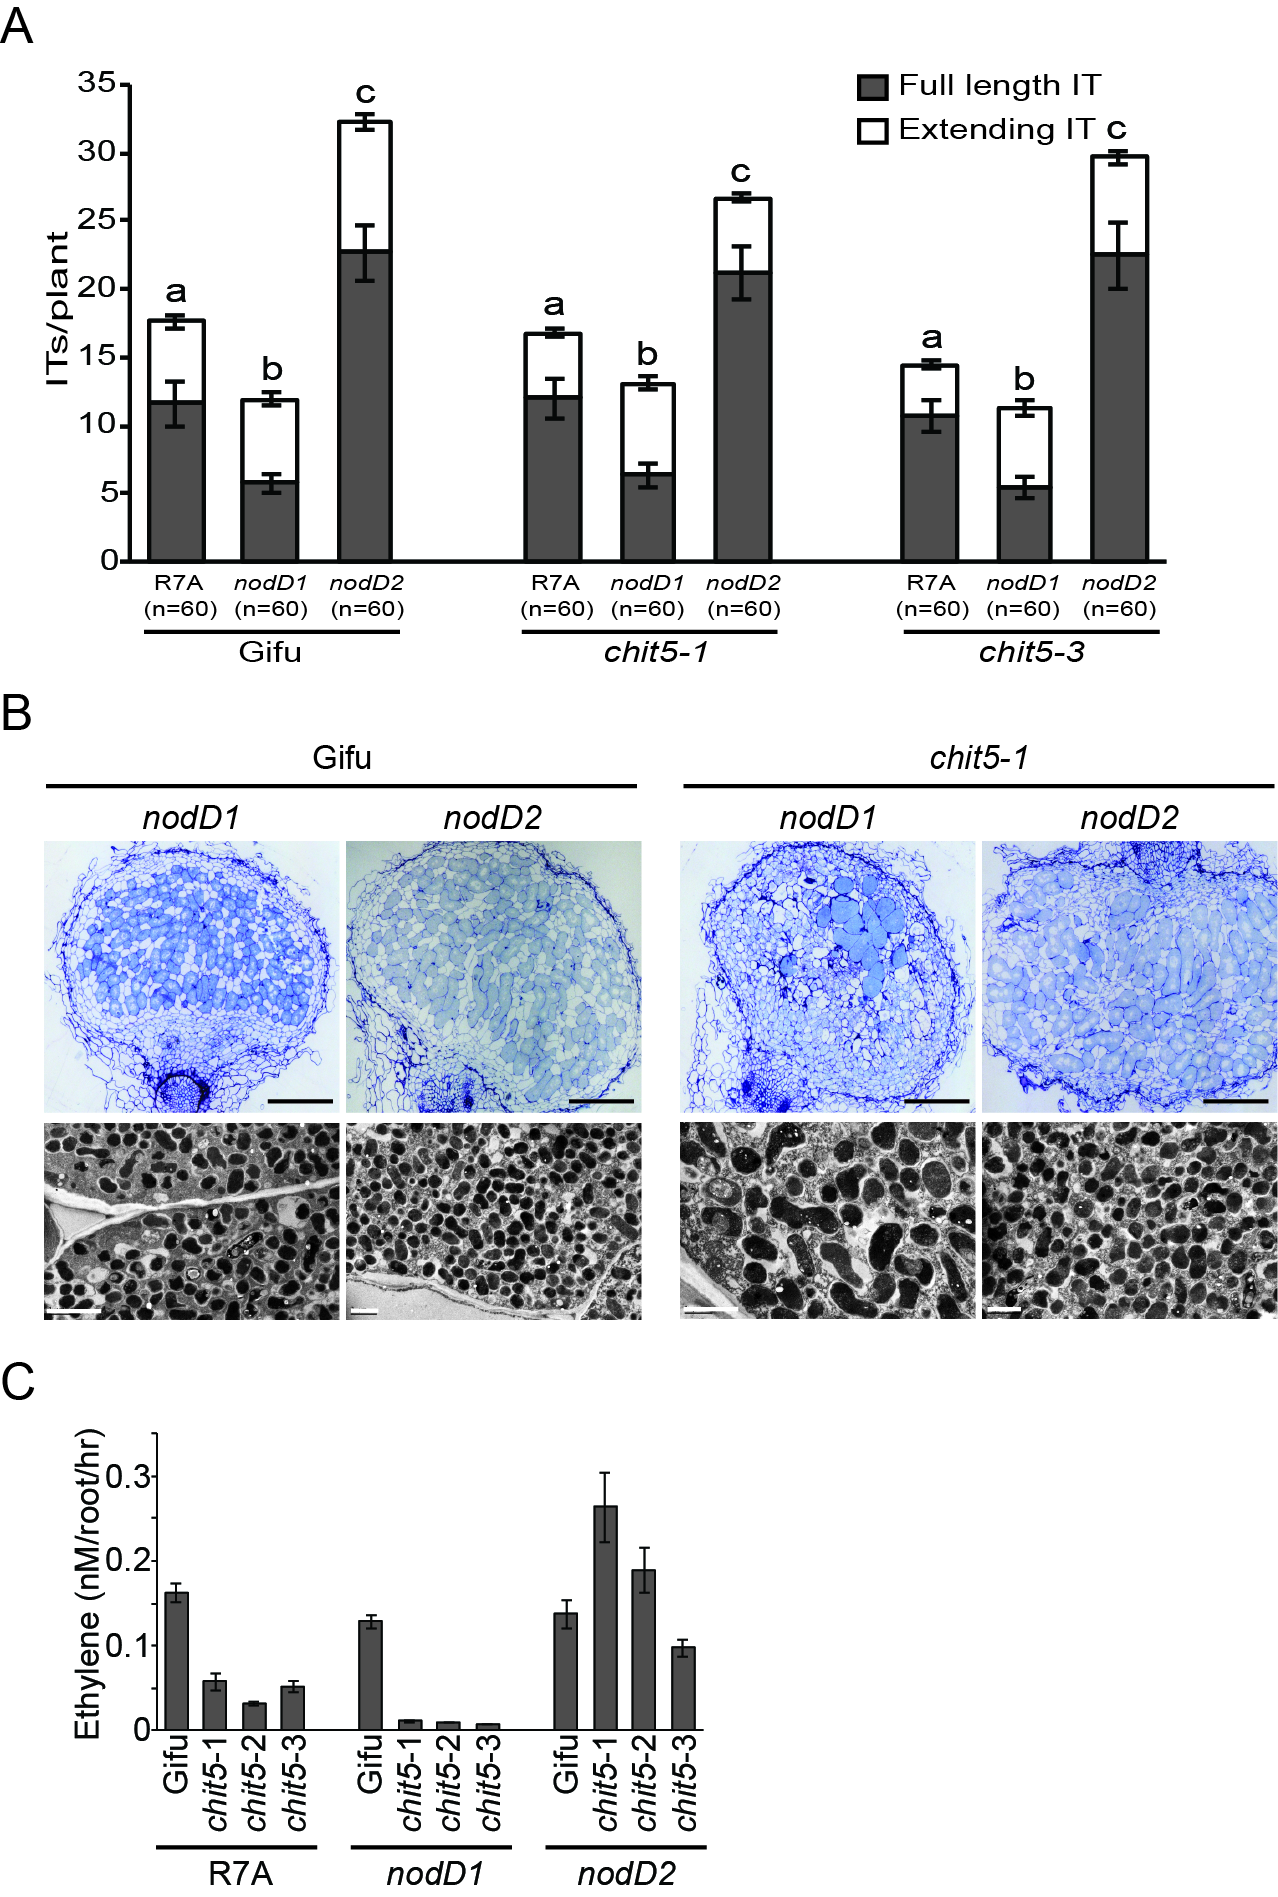

Supplement: supp [file elife-38874-supp-v1.zip › elife_poa_e38874_Figure_4_figure_supplement_1.tif]
